# Supplementary material for: Thirteen-years of observations on primary sugars and sugar alcohols over remote Chichijima Island in the western North Pacific
Source: Copernicus journal article supplement (doi:10.5194/acp-2017-480), 2017-07-17
Supplement: Supplementary file [file acp-2017-480-AC2-supplement.pdf]

To  
Prof. Jason Surratt  
Editor  
Atmospheric Chemistry and Physics (ACP)

**RE:** Submission of revised manuscript entitle “**Thirteen years of observations on primary sugars and sugar alcohols over remote Chichijima Island in the western North Pacific**” for publication in Atmospheric Chemistry and Physics

**Reference:** MS No.: acp-2017-480

Dear Prof. Surratt,

Thanks for the decision letter on our manuscript. We have revised the manuscript meticulously following the referees' comments and suggestions. The authors greatly appreciate the critical and useful comments by anonymous referee's that significantly improved the quality of our manuscript. Our responses and changes are included in the response letter as blue color. The changes in the revised manuscript are highlighted in yellow. Please find the response letter and revised manuscript.

We believe that revised manuscript is acceptable for publication in ACP.

Thanking you.

Sincerely yours,

Kimitaka Kawamura  
Professor of Chemistry,  
Chubu Institute for Advanced Studies,  
Chubu University, Kasugai 487-8501,  
Japan  
E-mail: [kkawamura@isc.chubu.ac.jp](mailto:kkawamura@isc.chubu.ac.jp)

## Authors' responses to the comments Referee # 2

### General

This is an interesting time-series paper on aerosol particle measurements of sugars and sugar alcohols at the remote island of Chichijima in the western north Pacific.

The authors should think about the numerical formats of their results. Sometime too many digits are listed which are uncertain in view of the calculated error width.

The English language of the manuscripts should be checked again.

Overall, I think this is an interesting paper for ACP publishable after minor revision

Authors are thankful to the reviewer for the positive recommendation. We carefully checked and improved English writing of through out the manuscripts.

### Details

**Title:** I would suggest 'Thirteen years ...' without hyphenation.

**Response:** We deleted the hyphenation from Thirteen years... in the title. (Please see the title in the revised MS).

**Abstract:** The only numbers given here are the range mass concentrations of 'total sugar compound'. It would be great if more quantitative information could be given in the abstract, e.g. on the observed trends.

**Response:** According to the reviewer's suggestions, we added some more information in the abstract. (Please see lines 34-36 in the revised MS).

**Line 64:** For these contribution fractions only Simoneit et al. (2004) is referenced - are there any more recent findings on this, which could be referenced? Can a range be given based on more references?

**Response:** According to the reviewer's suggestions, we modified the sentences and added new phrase with additional references. (Please see lines 65-73 in the revised MS.)

"Sugar compounds (SCs) contribute 13–26% and 63% of the total compound mass in the continental and marine aerosol samples, respectively (Simoneit et al., 2004a; 2004b). Yttri et al. (2007) reported that sugars (fructose, glucose, sucrose, trehalose) accounted for 0.6-3.1% of WSOC at urban and suburban sites in Norway. Tominaga et al., (2011) analyzed aerosol samples collected from urban and forest suburban sites from Japan and reported that sugars (arabinose, fructose, galactose, glucose, mannose, rhamnose, and xylose) accounted for 2.1% and 4.5% of WSOC in the fine and coarse mode ranges at Yokohama, respectively, and for 3.0% and 7.2% at Mt. Oyama, respectively."

We added a new reference: Tominaga, S., K. Matsumoto, N. Kaneyasu, A. Shigihara, K. Katono, N. Igawa (2011), Measurements of particulate sugars at urban and forested suburban sites, *Atmos. Environ.* 45, 2335-2339.

**Line 183:** I feel the section on PMF can considerably be shortened; much of this can be referenced.

**Response:** According to referee's suggestion, "Section 2.4 Positive matrix factorization (PMF) analysis" was significantly shortened. We added a new sentence: "The detailed

discussions of the determination and application of the PMF are reported in Norris et al. (2008), Paatero et al. (2002) and Zhou et al. (2004).” (Please see lines 206-208 in the revised MS.)

**Line 497:** The sentence starting 'Thirteen-year...' can be left out.

**Response:** According to referee's suggestions, we deleted the sentences starting from thirteen-years .....). (Please see line 484 in the revised MS).

**Line 669,** Summary and conclusion: Please make this consistent with the abstract. What is, finally, the conclusion of the paper?

**Response:** According to referee's suggestions, we modified the abstract and conclusion section as follows.

We modified sentence: “The primary sugars (glucose and fructose) maximized in summer, possibly due to an increased emission of vegetation products from the local vascular plants in Chichijima.” (Please see lines 27-29 in the revised MS).

Added a new sentence: “Sucrose and trehalose were found to present increasing trends from 2001 to 2013, while total sugar components did not show any clear trends during thirteen year periods.” (Please see lines 34-36 in the revised MS.)

We significantly modified summary and conclusion sections in the revised MS. (Please see lines 651-687).

1 **Thirteen years of observations on primary sugars and sugar alcohols over remote**  
2 **Chichijima Island in the western North Pacific**

3

4

5 Santosh Kumar Verma<sup>1,2</sup>, Kimitaka Kawamura<sup>1,3\*</sup>, Jing Chen<sup>1,4</sup>, and Pingqing Fu<sup>1,5</sup>

6

7

8 <sup>1</sup> Institute of Low Temperature Science, Hokkaido University, N19, W8, Kita-ku, Sapporo 060-  
9 0819, Japan

10 <sup>2</sup> Permanent address: State Forensic Science Laboratory, Home (Police) Department,  
11 Government of Chhattisgarh, Raipur 49001, India

12 <sup>3</sup> Now at Chubu Institute for Advanced Studies, Chubu University, Kasugai 487-8501, Japan

13 <sup>4</sup> Now at Institute of Geographic Sciences and Source Research, Chinese Academy of Sciences,  
14 Beijing 100101, China

15 <sup>5</sup> Now at LAPC, Institute of Atmospheric Physics, Chinese Academy of Sciences, Beijing  
16 100029, China

17

18

19 \*Corresponding author: [kkawamura@isc.chubu.ac.jp](mailto:kkawamura@isc.chubu.ac.jp)

20

21

22 **Abstract.** In order to understand the atmospheric transport of bioaerosols, we conducted long-  
23 term observations of primary sugars and sugar alcohols over remote Chichijima Island in the  
24 western North Pacific from 2001 to 2013. Our results showed that concentrations of total sugar  
25 compounds for 13 years ranged from 1.2 to 310 ng m<sup>-3</sup> (average, 46±49 ng m<sup>-3</sup>). We found that  
26 atmospheric circulations significantly affect the seasonal variations of bioaerosol distributions  
27 over the western North Pacific. The primary sugars (glucose and fructose) maximized in  
28 summer, possibly due to an increased emission of the vegetation products from local vascular  
29 plants in Chichijima. We also found higher concentrations of sugar components (arabitol,  
30 mannitol and trehalose) in more recent years during summer/autumn, suggesting an enhanced  
31 emission of fungal and microbial species over the island. Sucrose peaked in late winter to early  
32 spring, indicating a springtime pollen contribution by long-range atmospheric transport, while  
33 elevated concentrations of sucrose in early summer could be explained by long-range transport  
34 of soil dust from Southeast Asia to Chichijima. Sucrose and trehalose were found to present  
35 increasing trends from 2001 to 2013, while total sugar components did not show any clear  
36 trends during the thirteen years periods. Positive matrix factorization analyses suggested the  
37 locally emitted sugar compounds as well as long-range transported air borne pollen grains,  
38 microbes and fungal spores are the major contributors to total sugar compounds in the  
39 Chichijima aerosols. Backward air mass trajectories support the atmospheric transport of  
40 continental aerosols from the Asian continent during winter/spring over Chichijima.

41  
42 **Keywords:** Sugar compounds, fungal and microbial tracer, pollen tracer, bioaerosols, the  
43 western North Pacific.

44

## 45 **1 Introduction**

46 East Asia has experienced rapid economic developments and population growth since last  
47 several decades (Elliot et al., 1997; Jaffe et al., 1999, 2003), whose activities emit organic and  
48 bioaerosols into the atmosphere (Xu et al., 2011). The atmospheric particles are transported to  
49 downwind region in the Pacific, associated with Asian desert dust from the Taklamakan and  
50 Gobi Deserts, and Loess plateau (Duce et al., 1980; Iwasaka et al., 1983; Jaffe et al., 1997;  
51 Prospero and Savoie, 1989; Talbot et al., 1997). The transported dust contains bacterial cells,  
52 fungal spores, and microbial cells, which fall out over the Pacific and remote islands in the  
53 Pacific Ocean (Lacey and West, 2006; Mims and Mims, 2003). The microbes associated with  
54 bioaerosols significantly affect the natural environment of marine and land ecosystem in  
55 downwind regions (Graffin et al., 2003, 2007; Prospero et al., 2005). Long-range atmospheric  
56 transport plays a key role for the global distribution of microbes from source regions to  
57 receptor site (Graffin et al., 2001). Fungi and bacteria are often attached to dust particles,  
58 which can propagate diseases to human and plants (Brown and Hovmoller, 2002). Therefore,  
59 the transported organic- and bio-aerosols have been the focus of extensive studies for the past  
60 years (Yamaguchi et al., 2012).

61 Organic aerosols are composed of a complex mixture of different types of molecules, in  
62 which water-soluble organic compounds (WSOCs) are enriched (Graham et al., 2002). WSOCs  
63 play an important role in climate change and global radiative forcing by scattering or absorbing  
64 light directly or indirectly (Fuzzi et al., 2007). They can act as cloud condensation nuclei  
65 (CCN) (Kanakidou et al., 2005; Martin et al., 2010). Sugar compounds (SCs) contribute 13–  
66 26% and 63% of total WSOCs identified in continental and marine aerosol samples,  
67 respectively (Simoneit et al., 2004a; 2004b). Yttri et al. (2007) reported that sugars (fructose,  
68 glucose, sucrose, trehalose) accounted for 0.6-3.1% of the WSOC at urban and suburban sites  
69 in Norway. Tominaga et al. (2011) analyzed aerosol samples collected from urban and forest  
70 suburban site from Japan and reported that the sugars (arabinose, fructose, galactose, glucose,

71 mannose, rhamnose, and xylose) accounted for 2.1% and 4.5% of the WSOC in the fine and  
72 coarse mode ranges at Yokohama, respectively, and for 3.0% and 7.2% at Mt. Oyama,  
73 respectively. SCs are directly emitted from biological sources such as fungi, algae, pollen,  
74 spores and bacteria (Carvalho et al., 2003; Wang et al., 2009) and transported long distances in  
75 the atmosphere (Wang et al., 2011). They are also derived from suspended soil particles and  
76 associated biota (Rogge et al., 2006; Simoneit et al., 2004b; Wang et al., 2009), and biomass  
77 burning (Schmidl et al., 2008; Simoneit et al., 2002).

78 Primary sugars are emitted from biological sources (Medeiros et al., 2006). Glucose and  
79 fructose are emitted from terrestrial plant fruits, pollen, and detritus of vascular plants (Cowie  
80 and Hedges, 1984; Speranza et al., 1997). **Sucrose** is dominant sugar component in airborne  
81 pollen grains and plays a significant role in plant blossoming activity (Bielecki, 1995; Fu et al.,  
82 2012; Pacini, 2000). Trehalose is emitted from fungal metabolic activities and resuspension of  
83 soil particles and unpaved road dust (Rogge et al., 2007; Simoneit et al., 2004). Sugar alcohols  
84 are also emitted **from** biological sources like fungi and microbes via metabolic activities (Bauer  
85 et al., 2008). Sugar alcohols, i.e., arabitol and mannitol, are tracers for fungal spores (Jia and  
86 Fraser; 2011; Yang et al., 2012). Di Filippo et al. (2013) reported that arabitol and mannitol  
87 are key sugar components in fungal spores.

88 Chichijima Island is located in the western North Pacific: an outflow region of Asian  
89 dust (Mochida et al., 2003a). It is one of the best remote islands to study a long-range transport  
90 of Asian aerosols, because local pollutants in Chichijima are insignificant due to low  
91 population density and no major **sources from** industrial or anthropogenic activities (Chen et al.,  
92 2013). Kawamura et al. (2003) reported that **concentrations of** lower molecular weight fatty  
93 acids (**C<sub>12</sub>-C<sub>19</sub>**) derived from marine organisms **became** higher in summer, while **those of**  
94 higher molecular weight fatty acids (C<sub>21</sub>-C<sub>34</sub>), n-alkanes (C<sub>25</sub>-C<sub>35</sub>), n-alcohols (C<sub>20</sub>-C<sub>34</sub>) and  
95 dicarboxylic acids (C<sub>20</sub>-C<sub>28</sub>) derived from terrestrial higher plants and soil organic matter  
96 maximized in winter to spring. Seasonal variations of low molecular weight **(C<sub>2</sub>-C<sub>10</sub>)**

97 dicarboxylic acids and levoglucosan (biomass burning tracer) have also been reported in  
98 Chichijima aerosols by Mochida et al. (2003a) and Mochida et al. (2010), respectively.  
99 Although seasonal variation of saccharides was reported in Chen et al. (2013), the observation  
100 period is rather short.

101 Here, we report thirteen year data set of SCs in remote Chichijima Island. The goal of  
102 this study is to characterize seasonal and annual variations of SCs and specify their possible  
103 source regions. We will also discuss a potential role of Asian dust to control the distributions  
104 of bioaerosols over the western North Pacific. The outcomes of this study will improve our  
105 understanding about a possible influence of long-range transport of bioaerosols from the  
106 continent to the clean oceanic environment. We will compare the data set of SCs for the  
107 periods 1990-1993, 2001-2003 and 2010-2013, which may provide imperative information  
108 about decadal changes in the atmospheric conditions over Chichijima. Seasonal source  
109 identifications by positive matrix factorization (PMF) analysis will also be discussed for the  
110 measured SCs.

111

## 112 **2 Materials and methods**

### 113 **2.1 Sampling site and meteorological conditions**

114 The detailed information on the sampling site was reported in Kawamura et al. (2003) and  
115 Chen et al. (2013). Briefly, Chichijima Island is located in the western North Pacific (27°04'N;  
116 142°13'E), 1000 km south of Tokyo, Japan, and 2000 km east of the Asian continent (Figure 1).  
117 Total area of the island is 24 km<sup>2</sup> with a population of 2000 (Verma et al., 2015). The climate  
118 of Chichijima is classified as subtropical; it is warm to hot (temperature, 7.8-34.1 °C) and  
119 humid (relative humidity, 66-88%) all year round.

120 Figure 2 shows monthly averaged variations in the meteorological parameters of  
121 Chichijima during 2001-2013. It receives more precipitation in between April and July,  
122 September and October during the thirteen year period. The sampling site is less influenced by



123 the East Asian monsoon to receive heavy rainfall compared to Northeast Asia. The climate  
124 over Chichijima is strongly influenced by the seasonal changes in wind system. In  
125 winter/spring, the westerly winds are dominant with the air masses being enriched with Asian  
126 dust, industrial pollutants, biomass burning products, organic compounds and black carbon as  
127 well as bioaerosols emitted from East Asia and Eurasia (Figure 3) (Seinfeld et al., 2004;  
128 Simoneit et al., 2004b; Wang et al., 2009). Trade winds are dominant in summer/autumn,  
129 which transport clean and pristine marine air masses from the central Pacific to Chichijima  
130 (Kawamura et al., 2003, Mochida et al., 2010).

## 131 **2.2 Aerosol sampling and chemical analysis**

132 The details on aerosol sampling and chemical analysis are reported elsewhere (Chen et al.,  
133 2013; Mochida et al., 2010). Briefly, total suspended particle (TSP) samples were collected at  
134 the Ogasawara Downrange Station of the Japan Aerospace Exploration Agency (JAXA) in  
135 Chichijima Island (254 m, above sea level, asl). The samples were collected on weekly basis  
136 (January 2001 to November 2013) using a high-volume air sampler (Kimoto AS-810A) at a  
137 flow rate of  $1.0 \text{ m}^3 \text{ min}^{-1}$  and pre-combusted ( $450^\circ\text{C}$  for 6 h) quartz fiber filters (20 x 25 cm,  
138 Pallflex). Filter sample was placed in a pre-combusted glass jar with a Teflon-lined screw cap  
139 and stored in a dark freezer room at  $-20^\circ\text{C}$  prior to analysis in order to inhibit fungal growth.  
140 Due to the maintenance of the JAXA facility at sampling site, TSP samples were not collected  
141 for November–December 2004 and March–August 2005.

142 Total 590 aerosol samples were analyzed to determine primary sugars (xylose, fructose,  
143 glucose, sucrose and trehalose) and sugar alcohols (erythritol, arabitol, mannitol and inositol)  
144 during 2001 to 2013. An aliquot ( $21 \text{ cm}^2$ ) of the filters were extracted three times with  
145 dichloromethane/methanol (2:1, v/v) mixture using ultrasonic agitation for 10 minutes. A  
146 Pasteur pipette packed with quartz wool was used to remove particles and filter debris in the  
147 extracts. Filtrates were then concentrated using a rotary evaporator under vacuum and blown  
148 down with a stream of pure nitrogen gas. The total extracts were derivatized using 60  $\mu\text{l}$  of

149 N,O-bis-(trimethylsilyl)trifluoroacetamide (BSTFA) with 1% trimethylsilyl chloride in the  
150 presence of 10  $\mu\text{l}$  of pyridine in a sealed vial at 70  $^{\circ}\text{C}$  for 3 hours to convert hydroxyl groups to  
151 corresponding trimethylsilyl (TMS) ethers. The derivatized fractions were diluted with n-  
152 hexane containing internal standard of  $\text{C}_{13}$  n-alkane ( $1.43 \text{ ng } \mu\text{l}^{-1}$ ), prior to injection to gas  
153 chromatography-mass spectrometer (GC-MS).

154 Identification of SCs have been confirmed by the comparison of GC retention times and  
155 mass spectra with those of authentic standards as well as literature and library data. SCs were  
156 characterized by their common base peak at  $m/z$  217 and 204 with specific fragment ions for  
157 individual sugars, i.e.,  $m/z = 307$  (arabitol), 205 and 319 (mannitol), 205 (erythritol), 305 and  
158 318 (inositol), 361 (sucrose and trehalose), 191 (glucose), and 437 (fructose). The selected ion  
159 peak area and relative response factors determined by injection of authentic standards have  
160 been used for the quantification of sugar compounds. Field blank filters were analyzed as a real  
161 sample, but no target compounds were detected in the field blanks. The recoveries of the target  
162 compounds were better than 90%. Therefore, the data reported here were not corrected for  
163 recoveries. Analytical errors of SCs were generally  $<15\%$  based on duplicate analysis. The  
164 detection limits of primary sugars and sugar alcohols were  $105\text{-}557 \text{ pg } \mu\text{l}^{-1}$ , which corresponds  
165 to ambient concentrations of  $0.0015\text{-}0.0081 \text{ ng m}^{-3}$  under a typical sampling volume of 9000  
166  $\text{m}^3$  (Zhu et al., 2015).

167 The derivatized fractions were introduced into GC-MS using an Agilent model 7890 GC  
168 coupled to an Agilent model 5975 mass selective detector (MSD) operated in an electron  
169 impact mode at 70 eV and scanned from 40 to 650 Dalton. The GC separation was carried out  
170 on a DB-5MS fused silica capillary column (30 m long, 0.25 mm i.d., 0.25  $\mu\text{m}$  film thickness),  
171 with a temperature program of 50  $^{\circ}\text{C}$  for 2 min at a rate of  $15 \text{ }^{\circ}\text{C min}^{-1}$  from 50 to 120  $^{\circ}\text{C}$ , then  
172 from 120 to 305  $^{\circ}\text{C}$  at a rate of  $5 \text{ }^{\circ}\text{C min}^{-1}$  with a final isotherm hold at 305  $^{\circ}\text{C}$  for 15 min. The  
173 sample was injected on a splitless mode at an injector temperature of 280  $^{\circ}\text{C}$ . GC-MS data  
174 were acquired and processed with the Agilent GC/MSD ChemStation software.

175 **2.3 Backward air mass trajectory analysis**

176 In order to identify the source regions of sugar compounds in Chichijima aerosols, ten-day  
177 backward trajectories were calculated at 00:00 UTC of each sampling period for thirteen years  
178 using the NOAA Hybrid Single-Particle Lagrangian Integrated Trajectory  
179 (<http://ready.arl.noaa.gov/HYSPLIT.php>) (Figure 3). The starting height of the trajectories  
180 presented in this study is 500 m asl. We plotted thirteen year trajectories for each sampling day  
181 but there are no significant year-to-year changes in the atmospheric circulations. Therefore, we  
182 presented seasonal trajectories for recent year (December, 2011 to November, 2012) in Figure  
183 3 to understand the seasonal aerosol mass transport from the source regions to Chichijima  
184 Island. Backward trajectories significantly supported a long-range transport of air mass under  
185 the influence of existing meteorological parameters (Figure 3). The trajectories clearly show  
186 the influences of continental air masses during mid-autumn to mid-spring and of marine air  
187 masses during mid-spring to mid-autumn.

188 **2.4 Positive matrix factorization (PMF) analysis**

189 Positive matrix factorization (PMF 3.0, Environmental Protection Agency, USA) has  
190 been used as a powerful statistical tool that may resolve potential sources contributing to  
191 atmospheric levels of particle (as presented by %) when appropriate source profiles are not  
192 available (Paatero and Tapper, 1994). At the beginning PMF has been used in precipitation  
193 study (Juntto and Paatero, 1994) as well as air pollution and source apportionment studies  
194 (Polissar et al., 1999). Recently, it is widely used for the air quality and source apportionment  
195 (Xie and Berkowitz, 2006). In addition, PMF has been applied to the wastewater  
196 (Soonthornnonda and Christensen, 2008), lake sediments (Bzdusek et al., 2006) and soils (Lu  
197 et al., 2008). One of the main features of PMF results is their quantitative nature; it is possible  
198 to obtain the composition of the sources determined by the model.

199 PMF analysis was performed for quantitative estimation of sources for the collected  
200 samples using tracer compounds for primary sugars, sugar alcohols, and anhydrosugars. Based

201 on given understanding of sugar sources, 4-7 factors were examined and total five interpretable  
202 factors were characterized by the enrichment of each tracer compound, which reproduced more  
203 than 94% of SCs. Minimal robust and true Q values of the base run were 3001 and 3413,  
204 respectively. Concentrations and percentage of tracers in each factor of bootstrap run were  
205 close of those of base run results. The Q values and factor profiles of  $F_{\text{peak}}$  rotation runs showed  
206 no significant changes compared with base run, indicating stable PMF results. **The detailed**  
207 **discussions of the determination and application of the PMF are reported in Norris et al. (2008),**  
208 **Paatero et al. (2002) and Zhou et al. (2004).**

209 In winter/spring, Chichijima Island receives air masses enriched with anthropogenic  
210 aerosols from the Asian continent by strong westerly winds, whereas during summer/autumn it  
211 receives clean air masses from the Pacific Ocean under the influences of trade winds. The  
212 seasonal changes in the atmospheric circulation over Chichijima may have a significant  
213 influence on the seasonal distributions of SCs. **Therefore,** we performed the seasonal PMF  
214 analysis on the thirteen year sugar data set to better understand the seasonal source profile of  
215 individual sugar component. For seasonal PMF analysis, 3-5 factors were examined and 4  
216 factors were determined for each season. We included the data set of anhydrosugars from  
217 Verma et al. (2015) for PMF analysis.

218

## 219 **3 Results and discussion**

### 220 **3.1 Ambient concentrations of sugar compounds**

221 Temporal variations of primary sugars and sugar alcohols are shown in Figure 4. Nine sugar  
222 compounds (SCs) including five primary sugars and four sugar alcohols were detected in the  
223 aerosol samples collected from Chichijima Island. The concentrations of total SCs varied from  
224 1.23 to 339  $\text{ng m}^{-3}$  (average,  $46.7 \pm 49.5 \text{ ng m}^{-3}$ ) during 2001 to 2013 (Table 1). Concentrations  
225 of primary sugars and sugar alcohols were in the range of 0.28 to 176  $\text{ng m}^{-3}$  ( $23.3 \pm 25.7 \text{ ng m}^{-3}$ )  
226  $^3$ ) and 0.37 to 231  $\text{ng m}^{-3}$  ( $23.4 \pm 30.8 \text{ ng m}^{-3}$ ), respectively. Average concentration of primary

227 sugars in Chichijima aerosols is several times lower than that of primary sugars ( $62.0 \pm 54.9 \text{ ng}$   
228  $\text{m}^{-3}$ ) reported from Cape Hedo, Okinawa, Japan (Zhu et al., 2015) while that of sugar alcohols  
229 is equivalent to or little lower than that from Cape Hedo ( $29.5 \pm 35.5 \text{ ng m}^{-3}$ ).

230 Interestingly, primary sugars (49.9%) and sugar alcohols (50.1%) were found to  
231 contribute almost equal to total SCs during the entire study period. Mannitol (26.7%) and  
232 arabitol (21.4%) were the main contributors to total SCs followed by glucose (16.7%), sucrose  
233 (13.6%), fructose (10.2%), and trehalose (9.2%). Erythritol (1.6%), inositol (0.3%), and xylose  
234 (0.3%) were also present in the aerosols at lower concentration levels. Temporal plots of  
235 individual sugars clearly indicate a large variation of SCs (Figure 4). This large variation in the  
236 concentrations of SCs might be involved with seasonal changes in the atmospheric circulations  
237 over the western North Pacific (Kawamura et al., 2003).

### 238 3.1.1 Concentrations of primary sugars in total SCs

239 Glucose is the dominant sugar species among primary sugars with the concentration range of  
240  $0.05$  to  $64.3 \text{ ng m}^{-3}$  (average,  $7.79 \pm 8.80 \text{ ng m}^{-3}$ ). Similarly, a wide concentration range of  
241 fructose ( $0.03$ - $115 \text{ ng m}^{-3}$ ;  $4.69 \pm 8.04 \text{ ng m}^{-3}$ ) was also observed in Chichijima aerosols.  
242 Thirteen year mean concentrations of glucose and fructose were observed to be lower than  
243 those ( $27.2 \text{ ng m}^{-3}$  and  $16.4 \text{ ng m}^{-3}$ , respectively) reported for the aerosol samples (TSP) from  
244 Cape Hedo, Okinawa, Japan (Zhu et al., 2015). Glucose and fructose significantly contribute to  
245 total primary sugars (33.5% and 20.17%, respectively) in Chichijima aerosols. Primary sugars  
246 are abundant in the fragments of vascular plants in vegetated and forest areas (Medeiros et al.,  
247 2006). Pacini et al. (2000) reported that primary sugars are synthesized in leaves during  
248 photosynthesis and stored in root, stem, flower, pollen and fruit of growing plants. The nectars  
249 and fruits of tropical and subtropical plants also contain glucose and fructose abundantly  
250 (Backer et al., 1998). Graham et al. (2002) reported significant amounts of glucose and  
251 fructose in pollen, fern spores, and insects in aerosol samples collected from the Amazon forest.  
252 Chichijima Island is covered with endemic and vascular plants, which may emit glucose and

253 fructose. Moreover, different sources such as soil dust (Rogge et al., 2007; Simoneit et al.,  
254 2004), lichens (Dahlman et al., 2003) and biomass burning (Medeiros et al., 2006; Nolte et al.,  
255 2001) have also been reported as dominate sources for glucose and fructose.

256 Among all the SCs detected in the Chichijima aerosols, sucrose is the second most  
257 abundant sugar species ( $0.002\text{-}100\text{ ng m}^{-3}$ ;  $6.43\pm 12.9\text{ ng m}^{-3}$ ), accounting for 27.3% of total  
258 primary sugars. The average sucrose concentration observed in Chichijima is twice lower than  
259 that ( $13.2\text{ ng m}^{-3}$ ) from Cape Hedo, Okinawa, Japan (Zhu et al., 2015). Sucrose is synthesized  
260 in plant leaves and circulated by phloem to different plant sections, which is accumulated in  
261 root cells as well as developing flower buds (Bielecki, 1995; Jia et al., 2010). Sucrose is a  
262 dominant component in airborne pollen grains derived from flowering plants (Bielecki, 1995;  
263 Pacini, 2000). Simoneit et al. (2004a and 2004b) reported the presence of sucrose in surface  
264 soil and paved road dust. Sucrose was also observed in dry plant materials during harvesting  
265 period (Ma et al., 2009).

266 Thirteen year mean concentration of trehalose ranged from 0.01 to  $70.2\text{ ng m}^{-3}$   
267 ( $4.30\pm 7.28\text{ ng m}^{-3}$ ), whose average concentration accounts for 18.4% of total primary sugars  
268 detected in Chichijima aerosols for 13 years. Microbes (bacterial cell), fungal spores, yeast,  
269 algae, invertebrates, suspended soil dust, as well as plant species, contribute significantly to  
270 trehalose in the atmosphere (Elbein, 1974; Graham et al., 2003; Medeiros et al., 2006; Rogge et  
271 al., 2007; Simoneit et al., 2004; Wiemken, 1990). Xylose is a less abundant primary sugar,  
272 accounting for 0.60% of total primary sugars observed in Chichijima aerosols. The  
273 concentration range of xylose was  $0.001\text{-}1.35\text{ ng m}^{-3}$  ( $0.14\pm 0.18\text{ ng m}^{-3}$ ) during sampling  
274 period of thirteen years. Biomass burning activities emit xylose to the atmosphere. Cowie and  
275 Hedges (1984) reported that xylose is produced by angiosperm and gymnosperm plants,  
276 phytoplankton, and groups of microorganisms. Simoneit et al. (2004a) have reported xylose in  
277 soil dust from various locations in the United States and Japan. Wan and Yu (2007) also  
278 observed xylose in soils and associated microbiota.

### 279 3.1.2 Concentrations of sugar alcohols in total SCs

280 Thirteen year mean concentrations of arabitol and mannitol were found to be  $9.99 \pm 13.6 \text{ ng m}^{-3}$   
281 and  $12.5 \pm 17.5 \text{ ng m}^{-3}$ , which contribute to 42.7% and 53.3% of total sugar alcohols,  
282 respectively. The concentration ranges of arabitol ( $0.04\text{--}106 \text{ ng m}^{-3}$ ) and mannitol ( $0.10\text{--}118$   
283  $\text{ng m}^{-3}$ ) are comparable to those from the Mediterranean region, Israel (arabitol,  $1.85\text{--}58.3 \text{ ng}$   
284  $\text{m}^{-3}$  and mannitol,  $5.57\text{--}138 \text{ ng m}^{-3}$ ) (Burshtein et al., 2011). Yttri et al. (2007) also reported  
285 that arabitol and mannitol were main contributors of sugar alcohols in aerosol samples  
286 collected from the different background sites in Norway. Sugar alcohols (arabitol, mannitol)  
287 can be used as tracers for various fungal and algal species (Bauer et al., 2008a,b; Pashanska et  
288 al., 2002; Zhang et al., 2010). Loos et al. (1994) discussed arabitol and mannitol as potential  
289 sources of bacteria and other microbes. High levels of detritus from the spring bloom and  
290 autumn decomposition have been reported as significant sources for arabitol and mannitol in  
291 the vegetated region (Burshtein et al., 2011; Pashynska et al., 2002). Good positive correlations  
292 of arabitol ( $r = 0.63$ ) and mannitol ( $r = 0.72$ ) with glucose indicate a vegetation contribution to  
293 both sugar alcohols in Chichijima aerosols. Erythritol and inositol are less abundant sugar  
294 species, accounting for 3.29% and 0.66% of total sugar alcohols. Their concentration ranges  
295 are  $0.01\text{--}8.32 \text{ ng m}^{-3}$  and  $0.01\text{--}1.81 \text{ ng m}^{-3}$ , respectively. Significant positive correlations of  
296 both sugar species with arabitol and mannitol indicate similar sources for these SCs in  
297 Chichijima aerosols (Table 2).

### 298 3.2 Seasonal variations of total sugar compounds

299 Seasonal concentration range, mean and median values of individual sugars during the study  
300 periods of thirteen years are presented in Table 1. The concentrations of individual sugars were  
301 extensively fluctuated from season to season in aerosol samples collected at Chichijima  
302 (Figures 4 and 5a). The seasonally averaged concentrations of total SCs are higher in summer  
303 ( $71.5 \pm 70.9 \text{ ng m}^{-3}$ ) and autumn ( $57.0 \pm 64.2 \text{ ng m}^{-3}$ ) than spring ( $39.8 \pm 67.6 \text{ ng m}^{-3}$ ) and winter  
304 ( $18.2 \pm 34.0 \text{ ng m}^{-3}$ ) over Chichijima Island. Zhu et al. (2015) measured sugar components in

305 aerosol samples collected from Cape Hedo, Okinawa, Japan and reported 2 to 3 times higher  
306 concentrations in summer ( $136 \text{ ng m}^{-3}$ ) and spring ( $133 \text{ ng m}^{-3}$ ) than autumn ( $86 \text{ ng m}^{-3}$ ) and  
307 winter ( $40 \text{ ng m}^{-3}$ ), whose seasonal trends are similar to Chichijima. Wan and Wu (2007)  
308 reported different seasonal variations with the highest concentration in autumn ( $375 \text{ ng m}^{-3}$ ),  
309 followed by winter ( $292 \text{ ng m}^{-3}$ ) and spring ( $84 \text{ ng m}^{-3}$ ) for the continental urban aerosols  
310 collected from Hong Kong. These concentrations in Hong Kong are 16 and 6 times higher than  
311 those of the remote Chichijima samples for winter and autumn, respectively. Interestingly, the  
312 different seasonal trends between the continental urban sites and two islands in the western  
313 North Pacific may be associated with different sources and transport pathways between the  
314 urban and marine environments.

### 315 **3.2.1 Seasonal variations of primary sugars**

316 Glucose maximized in summer ( $11.0 \pm 9.02 \text{ ng m}^{-3}$ ) followed by autumn ( $9.25 \pm 8.63 \text{ ng m}^{-3}$ ),  
317 spring ( $7.68 \pm 10.3 \text{ ng m}^{-3}$ ) and winter ( $3.11 \pm 3.53 \text{ ng m}^{-3}$ ) (Table 1 and Figure 5h). Glucose is  
318 the most abundant primary sugar in Chichijima aerosols. In winter/spring, Chichijima is  
319 influenced by strong westerly winds that deliver the air masses from the Asian continent  
320 including Mongolia, Russian Far East and North China, where vegetation is active.  
321 Consequently, declined concentrations of glucose in winter mean a depressed transport of  
322 glucose associated with continental bioaerosols from Asia despite long-range transport of  
323 Asian dusts due to strong westerly winds. The local vegetation (vascular plants) in Chichijima  
324 Island might be responsible to the enhanced concentration of glucose during growing season  
325 (spring and summer) and decaying periods of plant leaves (autumn). Seasonal PMF analysis  
326 also supports dominant sources of vegetation for glucose among four factors, which  
327 contributed >75% for mixed factor in summer (Figure 6c), >80% for fungal and vegetation  
328 factor in autumn (Figure 6d), and >75% for vegetation factor in spring (Figure 6b).

329 Fructose shows the highest concentrations in summer ( $7.25 \pm 7.63 \text{ ng m}^{-3}$ ) followed by  
330 spring ( $4.51 \pm 9.21 \text{ ng m}^{-3}$ ), autumn ( $3.70 \pm 2.68 \text{ ng m}^{-3}$ ) and winter ( $3.36 \pm 10.2 \text{ ng m}^{-3}$ ). As



331 shown in Table 2, a significant correlation ( $r=0.57$ ) was obtained between glucose and fructose.  
332 Burshtein et al. (2011) reported similar correlations for both sugar species, suggesting a  
333 **contribution** of glucose and fructose from the local vegetation in summer (Baker et al., 1998;  
334 Pacini, 2000). Monthly mean concentrations of fructose show two prominent peaks in  
335 February-March and June-July, the latter peak may be due to the local vegetation in Chichijima  
336 (Figure 5g). The fructose peak in February-March may be influenced by air borne pollen grains  
337 in the spring bloom of flowering plants. High concentration of fructose was observed in spring  
338 followed by summer, indicating an input of this sugar compound from pollen grains (Fu et al.,  
339 2012). The positive correlation of fructose with sucrose (pollen tracer) supports the similar  
340 sources. Seasonal PMF analysis further supports the identical source for fructose and sucrose;  
341 that is, among four factors, fructose contributes  $>70\%$  and  $>60\%$  for pollen factor in spring  
342 (Figure 6b) and winter (Figure 6a), respectively.

343 Seasonal mean concentrations of trehalose showed a maximum in summer ( $7.06\pm 8.49$  ng  
344  $m^{-3}$ ) followed by autumn ( $6.09\pm 8.81$  ng  $m^{-3}$ ), spring ( $2.93\pm 6.08$  ng  $m^{-3}$ ) and winter ( $1.03\pm 1.26$   
345 ng  $m^{-3}$ ) (Table 1). Monthly mean concentrations of SCs for 13 years show that concentrations  
346 of trehalose are higher during June to October (Figure 5j). Ma et al. (2009) reported higher  
347 concentrations of trehalose at the urban site of Guangzhou, China during summer and autumn.  
348 Similarly, Wan and Wu (2007) reported a similar autumn maximum in Hong Kong. On the  
349 other hand, different seasonal trends of trehalose were reported for the aerosol samples (TSP)  
350 collected in USA (Medeiros et al., 2006), China (Wang et al., 2011), Australia (Hackl et al.,  
351 2000), and Gosan, Jeju Island in the western North Pacific Rim (Fu et al., 2012). In the above  
352 studies, highest concentrations of trehalose were reported in early spring due to the re-  
353 suspension of soil particles during agricultural practice. Hackl et al. (2000) also obtained  
354 abundant trehalose in spring, and proposed that trehalose can be used as a tracer of soil dust  
355 emission to the atmosphere. However, we did not detect a spring peak of trehalose in  
356 Chichijima aerosols, suggesting that soil dust contribution of trehalose over Chichijima is

357 insignificant via long-range atmospheric transport. Seasonal PMF analysis for autumn showed  
358 that more than 85% of trehalose was contributed by microbial factor among four factors  
359 (Figure 6d). An indirect contribution of trehalose from soil dust will be discussed later.

360 The seasonal mean concentrations of sucrose are almost equal during spring ( $8.80 \pm 18.0$   
361  $\text{ng m}^{-3}$ ), summer ( $7.31 \pm 11.5 \text{ ng m}^{-3}$ ) and winter ( $6.60 \pm 13.1 \text{ ng m}^{-3}$ ), except for autumn  
362 ( $2.76 \pm 4.35 \text{ ng m}^{-3}$ ) (Table 1). The similar seasonal distributions suggest multiple sources of  
363 sucrose in Chichijima aerosols. Monthly mean concentrations of sucrose show two peaks  
364 during February-March and June-July (Figure 5i). The March peak of sucrose was reported in  
365 the forest area of Sapporo, Japan to be 3 to 7 times more abundant than other months due to  
366 springtime pollen emissions (Miyazaki et al., 2012). Fu et al. (2012) analyzed pollen samples  
367 from different plant species (white birch, Chinese willow, Peking willow) for SCs and found  
368 the highest concentrations of sucrose followed by fructose and glucose in pollen. The pollen  
369 emissions from developing buds of plants may be the reason for the increased concentration of  
370 sucrose and fructose in February and March over Chichijima Island in the western North  
371 Pacific. Seasonal PMF analysis shows that sucrose contributed 100% in spring and >80% in  
372 winter, suggesting a significant pollen contribution for sucrose in those seasons (Figures 6b  
373 and 6a).

374 However, the possibilities of pollen transport from East Asia to Chichijima cannot be  
375 excluded because pollens can travel long distances with springtime high-speed winds by  
376 westerlies (Rousseau et al., 2006). The pollen grains emitted from flowering boreal forest in  
377 China, Mongolia, Siberia and Russian Far East, could significantly be delivered to the western  
378 North Pacific during spring, which may result in the contribution of sucrose and fructose to  
379 Chichijima aerosols. Recent studies have discussed a long-range transport of airborne pollen  
380 from North America to Greenland in spring (Rousseau et al., 2008). Lorenzo et al. (2006)  
381 reported the long-range transport of airborne allergenic pollen to central Italy. Makra et al.  
382 (2010) reported a long-range transport of airborne pollen in three European cities by applying

383 three-dimensional clustering of backward trajectories. Several studies also discussed a long-  
384 range transport of pollen to the remote arctic region (Andrews et al., 1980; Bourgeois et al.,  
385 2001; Campbell et al., 1999; Hicks et al., 2001; Hjelmroos and Franzen, 1994; Rousseau et al.,  
386 2004).

387 These observations may support that westerly winds have delivered pollen grains from  
388 the Asian continent including Mongolia, Siberia, and Russian Far East to Chichijima Island in  
389 spring. Using a box model and typical settling velocity of pollens (3 cm/sec) with the grain size  
390 of 30  $\mu\text{m}$  in diameter (Sosnoskie et al., 2009), we estimated lifetime of pollen grains to be 9.3  
391 hours in the atmospheric marine boundary layer (height of 1 km above the ocean surface). The  
392 settling velocity of the pollens is ca. 20 times larger than that of typical marine aerosols (Slinn  
393 and Slinn, 1980). Because pollen grain sizes range from 10  $\mu\text{m}$  to 100  $\mu\text{m}$  in diameter, the  
394 lifetime of pollens may have a large uncertainty. If pollens could be largely transported in the  
395 free troposphere (e.g., 5 km high) to the North Pacific from the Asian continent, then lifetime  
396 of typical pollen grains would increase upto 2 days. These calculations for the lifetime of  
397 pollen grains further support their long-range atmospheric transport from the Asian continent  
398 over the western North Pacific. Based on backward air mass trajectories (Figure 3), we can  
399 roughly estimate the transport time from East Asia to Chichijima site to be 2-4 days in winter  
400 and spring. It is also of interest to note that pollens can rapture under condition of high relative  
401 humidity (RH) (Hader et al., 2014; Miguel et al., 2006; Wright et al., 2014), which leads to  
402 smaller particles with longer residence time in the atmosphere.

403 In addition, tilling process after wheat crop harvesting in farmland causes an enhanced  
404 exposure of wheat root associated with soil particles into the atmosphere. China, India, and  
405 USA are three largest countries for wheat production in the world. In China and India there are  
406 two seasons (spring and winter) for wheat crops; winter wheat is harvested from mid-May to  
407 mid-July. During those periods (early summer), Chichijima Island is highly influenced by trade  
408 winds (Figure 3). However, air mass trajectories clearly show the occasional atmospheric

409 transport from Southeast Asia to Chichijima **in summer** (Pavuluri et al., 2010). PMF results of  
410 sucrose for summer (Figure 6c) and autumn (Figure 6d) account for >85% and >90%,  
411 respectively, for soil dust factor among four source factors, suggesting an additional source of  
412 soil dust for sucrose in Chichijima **aerosols** (Simoneit et al., 2004). The elevated sucrose  
413 concentrations in June and July (summer; non-flowering season) suggest the **long-range**  
414 transport of sucrose associated with soil particles under the influence of occasional air mass  
415 transport from Southeast Asia **in summer** (Figure 3).

416 Xylose was found as the least abundant sugar compound in the aerosol samples. The  
417 maximum concentration of xylose ( $1.35 \text{ ng m}^{-3}$ ) was found in summer whereas minimum  
418 ( $0.001 \text{ ng m}^{-3}$ ) in spring (Table 1). Summer mean concentration ( $0.18 \pm 0.26 \text{ ng m}^{-3}$ ) was highest  
419 (Table 1). The PMF analyses showed that xylose contributed >75% for BB factor in winter  
420 (Figure 6a) and >70% in autumn (Figure 6d) for microbial factor. These results suggest  
421 different sources and seasons for xylose; i.e., biomass burning in winter (Sullivan et al., 2011)  
422 and groups of microorganisms in summer (Cowie and Hedges, 1984).

### 423 **3.2.2 Seasonal variations of sugar alcohols**

424 The seasonal mean concentrations of arabitol and mannitol are higher in summer/autumn than  
425 spring/winter (Table 1). The concentrations of arabitol are equally distributed between summer  
426 ( $15.1 \pm 12.9 \text{ ng m}^{-3}$ ) and autumn ( $15.8 \pm 18.3 \text{ ng m}^{-3}$ ) with lower levels in spring ( $7.13 \pm 9.50 \text{ ng}$   
427  $\text{m}^{-3}$ ) and winter ( $1.73 \pm 2.60 \text{ ng m}^{-3}$ ). Mannitol maximized in summer ( $21.7 \pm 19.7 \text{ ng m}^{-3}$ )  
428 followed by autumn ( $18.2 \pm 19.9 \text{ ng m}^{-3}$ ), spring ( $7.95 \pm 13.8 \text{ ng m}^{-3}$ ) and winter ( $1.89 \pm 2.81 \text{ ng}$   
429  $\text{m}^{-3}$ ). Arabitol and mannitol strongly co-varied throughout the study period. As depicted in  
430 thirteen year monthly mean concentrations of total SCs (Figure 5b,c), we found elevated  
431 concentrations of sugar alcohols from May to October. Similar seasonal trends were reported  
432 for the aerosol samples collected from Gosan, Jeju Island in the western North Pacific Rim (Fu  
433 et al. 2012) and urban aerosol samples from Ghent, Belgium (Pashynska et al., 2002). In above  
434 studies, higher relative abundances of arabitol and mannitol in total sugar alcohols were

435 reported during late summer to autumn. The higher concentration of arabitol in autumn was  
436 also reported for aerosol samples from the Mediterranean region in Israel (Burshtein et al.,  
437 2011). Erythritol and inositol showed the similar seasonal trend, but their concentrations are  
438 lower than the former two sugar species.

439 Sugar alcohols are emitted to the atmosphere from a variety of bacteria, few green algal  
440 lichens and fungi (Dahlman et al., 2003; Filippo et al., 2013). Arabitol and mannitol are  
441 abundant in fungal spores (Lewis and Smith, 1967; Yttri et al., 2007). Arabitol ( $r = 0.73$ ) and  
442 mannitol ( $r = 0.80$ ) showed a strong co-variance with trehalose, suggesting identical sources of  
443 sugar species in Chichijima. The PMF analysis showed that fungal factor and mixed factor  
444 (fungal, vegetation, and microbial) accounted for 25% and 54.2% of total SCs observed in  
445 summer, respectively (Figure 6c). In autumn, fungal and vegetation factor contributed 71% of  
446 total SCs detected in Chichijima aerosols (Figure 6c). In winter (Figure 6a) and spring (Figure  
447 6b) fungal and vegetation factor and mixed factor account for 31.2% and 37.2% of total SCs,  
448 respectively. This is reasonable because fungal and microbial activities are lower during  
449 winter/spring as compared to summer/autumn. The meteorological factors such as RH and  
450 temperature significantly affect fungal and bacterial activity (Kim and Xiao, 2005; Malik and  
451 Singh, 2004). Higher RH and temperature are crucial in increasing fungal and bacterial growth  
452 (Sharma and Razak, 2003). Their maximum growth was observed under the condition of 92-  
453 100% RH (Ibrahim et al., 2011). Higher concentrations of arabitol and mannitol in summer and  
454 autumn may be caused by the increased fungal and bacterial activities in Chichijima Island.

455 Several studies have described the occurrence of fungi in marine environment (Jones,  
456 1976; Kohlmeyer and Kohlmeyer, 1991; Moss, 1986). The fungal species eject spores from  
457 hard materials like coral and sand grains. Some fungi also eject spores from woods associated  
458 with sand in summer/autumn when higher ambient temperature and RH are available (Jones  
459 and Mitchell, 1996). Marine fungal growths are observed on several mediums of substrates  
460 such as wood, sediments, muds, soil, sand, algae, corals, decaying leaves of mangroves and

461 living animals in marine environment (Bremer, 1995; Kohlmeyer and Kohlmeyer, 1979;  
462 Nagakiri et al., 1996). Although the above-mentioned studies have claimed the occurrence and  
463 growth of marine fungi on several mediums of substrates, the knowledge of the role of marine  
464 fungi in sediments and decaying dead animals are still insufficient due to a lack of appropriate  
465 data set. It is still unclear if these fungi are active in sediments (Hyde et al., 1998). Therefore,  
466 due to the inadequate data set, we doubt the marine contribution of sugar alcohols (arabitol,  
467 mannitol) to Chichijima aerosols.

468 Thirteen year monthly mean concentrations of SCs clearly show slightly decreased  
469 concentrations of arabitol, mannitol, and erythritol in July and August; a similar trend was  
470 observed for trehalose (Figure 5b,c,e,j). These sugar compounds are derived from the microbial  
471 activities in source regions. The thirteen year precipitation record over Chichijima Island  
472 shows that precipitations were lowered in July and August (Figure 2). The lower precipitation  
473 amount decreases the RH (Figure 2) and thus depresses the fungal and microbial activities. The  
474 lower precipitation also suppresses the moisture contents in the surface soil of Chichijima,  
475 which should result in a significant decline of local fungal and other microbial activities on the  
476 ground of Chichijima Island. Decreased precipitation might be a possible reason for the lower  
477 concentrations of arabitol, mannitol, and trehalose in July and August.

### 478 **3.3 Annual variations and decadal comparisons of SCs**

479 The annual variations in the concentrations of primary sugars and sugar alcohols are shown in  
480 Figure 7a. The annual mean concentrations of total SCs varied randomly during 2001 to 2013.  
481 As shown in Figure 7 (i, j, f and d), concentrations of sucrose, trehalose, xylose, and inositol  
482 increase from 2001 to 2013 in Chichijima aerosols. Similarly, arabitol (Figure 7b), glucose  
483 (Figure 7h), and fructose (Figure 7g) show clear increasing trends from 2006 to 2013 whereas  
484 mannitol (Figure 7c) and erythritol (Figure 7e) show a random trend. Here, we compare the  
485 data set of SCs for the periods of 1990-1993 (Period, P-I) with the current observations from  
486 2001 to 2003 (P-II) and 2010 to 2013 (P-III) (Table 3) (Figures 8a, b, c).

487           The comparison for three periods indicates that concentrations of anhydrosugars are  
488 highest in winter followed by autumn. Their concentrations significantly increased from P-I to  
489 P-II/P-III (Figure 8a). The detailed discussions on anhydrosugars were reported in Verma et al.  
490 (2015). Here, we refer the data set of anhydrosugars for the decadal comparison with SCs.  
491 Interestingly, biomass-burning tracers (BB-tracers; levoglucosan, mannosan and galactosan)  
492 showed a significant difference in the decadal trends among three periods (i.e., P-I, P-II, and P-  
493 III) during winter and autumn. In winter, BB-tracers showed an increasing trend from P-I to P-  
494 III (Figure 8a). Biomass burning is common in winter for house heating (Simoneit et al.,  
495 2004a), thus it is obvious that the lower ambient temperature is the more biomass burning  
496 activities are. Westerly winds abundantly transport biomass-burning products over Chichijima  
497 Island in the western North Pacific with air masses derived from East Asia, Siberia, Mongolia,  
498 and Russian Far East during winter (Bendle et al., 2007; Simoneit and Elias, 2010; Verma et al.,  
499 2015). In contrast, BB-tracers in autumn show an opposite trend (i.e., higher concentrations in  
500 P-I followed by P-II and P-III) compared to those in winter (Figure 8a).

501           The difference in the concentrations of anhydrosugars in winter and autumn during P-I is  
502 insignificant while the concentrations are 3 and 5 times higher in winter than autumn for P-II  
503 and P-III, respectively. This seasonal shifting in the concentrations of anhydrosugars may be  
504 attributable to the changes in the strength of both westerly and trade wind systems from mid  
505 autumn to early winter among three periods (Chen et al., 2013). In contrast, the concentrations  
506 of primary sugars were 2 to 7 times higher during P-II and P-III than P-I period in summer and  
507 autumn (Figure 8b). PMF analysis showed that local emissions from vegetation are important  
508 contributor for primary sugars (glucose, fructose and sucrose). Therefore, a drastic increase in  
509 the concentrations of primary sugars in summer/autumn for P-II and P-III than P-I may be  
510 caused by an increased emission of primary sugars by local vegetation under the influence of  
511 meteorological conditions in the western North Pacific. However, a possible soil dust

512 contribution of primary sugar (sucrose) associated with an occasional air mass transport from  
513 Southeast Asia cannot be excluded.

514 Similar to primary sugars, a drastic increase in the concentrations of sugar alcohols was  
515 observed for P-II and P-III compared to P-I period (Figure 8c). The concentrations of sugar  
516 alcohols in P-II and P-III are 6 to 19 times higher than those of P-I in summer/autumn (Table  
517 3; Figure 8c). Arabitol and mannitol are key sugar alcohols and **are** reported as fungal and  
518 microbial tracers, which contribute significantly to total SCs (Bauer et al., 2008b; Lewis and  
519 Smith, 1967; Zhang et al., 2010). Microbes such as fungi and bacteria are significantly  
520 increasing in the Asian and European countries (Yamaguchi et al., 2012). They are largely  
521 transported towards downwind regions in the Pacific Ocean from the Asian continent in  
522 winter/spring under the influence of strong westerlies (Griffin et al., 2001, 2003, 2007; Hua et  
523 al., 2007; Uno et al., 2009) and settled down by wet and dry deposition in the western North  
524 Pacific according to air mass trajectories (Figure 3).

525 Hirst **et al.** (1967) **studied** the lifetime of fungal spores **and** long-range **transport of** spores.  
526 **They reported** that the **fungal** spores are **in** between 2 and 200  $\mu\text{m}$  in diameter (mostly 5 to 30  
527  $\mu\text{m}$ ), **whose** settling velocity **is** between 0.05 and 3.0 cm/sec with a mode of less than 1 cm/sec,  
528 and that different fungal spores vary significantly in shape and ornamentation. This study  
529 suggested the possibilities of long-range **transport of** fungal spores. Jeon et al. (2011) and  
530 Yamaguchi et al. (2012) have analyzed aerosol samples collected during the Asian dust event  
531 over the Sea of Japan, and identified similar groups of microbes (bacterial cells) transported  
532 from the source regions of Asian dust. Consequently, bacteria and fungi **associated with**  
533 **bioaerosols** grow extensively during summer/autumn, when the climate conditions **are**  
534 **favorable** (i.e., higher RH and temperature) for their metabolic activities (Morris et al., 2004).  
535 Accordingly, an increased transport of bioaerosols **for** the last decade may have caused a  
536 drastic increase in the concentrations of sugar alcohols during P-II and P-III compared to P-I  
537 period over the western North Pacific.



### 538 3.4 Source apportionment of SCs

539 To investigate the source apportionment of sugar components, the data sets of Chichijima  
540 aerosols were subjected to positive matrix factorization (PMF) analysis. Based on the PMF  
541 analysis, total five factors were determined to be significant to classify the sources of sugar  
542 compounds (SCs). Five factors successfully explored the source profile for the individual sugar  
543 component. Factor profiles resolved by PMF analysis are shown in Figures 6 and 9-11, where  
544 percentages of each component summed for factors 1 to 5 are calculated to be 100%.

545 Vegetation factor (Figure 9) was dominated by xylose (75%), glucose (48%), and  
546 fructose (36%). Xylose is significantly produced by gymnosperm and angiosperm (Cowie and  
547 Hegdes, 1984; Sjoström, 1981). Fructose and glucose are highly water-soluble sugar species,  
548 and present in the bark and leaves of plants (Fu et al., 2012). Glucose is the second most  
549 abundant sugar that contributed to this factor. Cowie and Hegdes (1984) reported higher  
550 concentration of glucose in vascular plants and phytoplankton in the marine environment. The  
551 SCs emitted by the vegetation during growing season significantly contribute to vegetation  
552 factor. In Chichijima aerosols, glucose and fructose are significant contributors in spring  
553 (Figure 6b), summer (Figure 6c) and autumn (Figure 6d). Therefore, the respective factors in  
554 Figure 6 are termed as a vegetation source for both sugar species. This is reasonable because  
555 plants started growing in spring and summer seasons. In autumn, leaf senescence and decay  
556 result in the emission of glucose and fructose to the atmosphere.

557 Fungal and microbial factor (Figure 9) was characterized by trehalose (88%), mannitol  
558 (64%), and arabitol (54%). These sugars that contribute to fungal and microbial factor are  
559 associated with fungal spores, bacteria and yeast (Bauer et al., 2008a; Medeiros et al., 2006;  
560 Wiemken, 1990). The three sugars are good tracers of fungal spores and microbes (Loos et al.,  
561 1994; Rogge et al., 2007). Arabitol and mannitol are produced by a large variety of fungal  
562 species (Ion et al., 2005; Medeiros et al., 2006), and considered as a suitable tracer for fungal  
563 and bacterial metabolic activities (Bauer et al., 2008b; Elbein et al., 1974; Rogge et al., 2007).

564 Arabitol is strongly correlated with mannitol ( $r=0.88$ ), suggesting similar sources for both  
565 species (Table 2) (Elbert et al., 2007). Fungi, bacteria, and other microbes in soils are the main  
566 sources for trehalose (Graham et al., 2003; Rogge et al., 2007; Simoneit et al., 2004). An  
567 excellent correlation of trehalose with arabitol and mannitol suggested similar sources in the  
568 marine environment (Table 2) (Lewis and Smith, 1967).

569 Sugar alcohols have been proposed as tracers for microbes and fungal spores (Bauer et  
570 al., 2008b; Ion et al., 2005; Medeiros et al., 2006; Rogge et al., 2007). The fungal and  
571 microbial activities are considered higher during summer and autumn due to higher  
572 temperature and RH. The above discussions for the sources of arabitol, mannitol and trehalose  
573 are well supported by the seasonal PMF analysis. Arabitol and mannitol are well contributed in  
574 summer (Figure 6c, fungal factor and mixed factor) and autumn (Figure 6d, fungal and  
575 vegetation factor). Correspondingly, trehalose also contributed in summer (Figure 6c, mixed  
576 factor) and autumn (Figure 6d, microbial factor). Therefore, significant contributions of  
577 arabitol, mannitol and trehalose are observed during the respective seasons in Chichijima  
578 aerosols.

579 Mixed factor (Figure 9) is associated with erythritol (94%), arabitol (44%), mannitol  
580 (34%), inositol (32%), glucose (24%), and fructose (31%). Due to the highly miscellany  
581 characteristics of fungi, other microbes, and plant debris, it is quite difficult to specify the  
582 particular source for individual sugar species (Percival, 1970). Arabitol and mannitol are also  
583 attributed to the vegetation (photosynthesized by mature leaves) (Burshtein et al., 2011;  
584 Pashynska et al., 2002). The contributions of arabitol and mannitol in winter (Figure 6a, mixed  
585 factor) and spring (Figure 6b, mixed factor) indicate other sources than fungal spores in the  
586 Chichijima aerosols. Because the fungal and microbial growth is less important in winter and  
587 spring compared to summer/autumn. Therefore, this factor (Figure 9) should be associated with  
588 mixed sources from microbial and vegetational activities. Contemplating of mixed sources is

589 very likely because sugar species that are highly apportioned to vegetation factor contribute, to  
590 some extent, to the same sources that are responsible to fungal and microbial factor (Figure 9).

591 **Biomass burning (BB)** factor (Figure 9) is loaded significantly with levoglucosan (94%),  
592 mannosan (91%), and galactosan (90%), and moderately with xylose (20%). These species are  
593 associated with biomass burning (Fraser and Lakshmanan, 2000; Graham et al., 2002;  
594 Simoneit, 2002). Nolte et al. (2001) and Medeiros et al. (2006) also reported that biomass  
595 burning-influenced aerosols are enriched with levoglucosan, mannosan, and galactosan.  
596 Kawamura et al. (2003) and Mochida et al. (2010) reported that biomass-burning products are  
597 abundantly transported to Chichijima under the influence of westerly winds during  
598 winter/spring (Figure 3). These results are well supported by the fact that BB factor is  
599 associated with SCs, which are derived from biomass burning in East Asia. The seasonal PMF  
600 analysis (Figure 6) also supports the above explanation; BB products are contributed highest in  
601 winter/spring (18.8% and 6.3%) under the influence of westerly winds, followed by  
602 summer/autumn (3.8% and 4.1%) for total sugars in the aerosol samples collected from  
603 Chichijima Island.

604 Pollen factor (Figure 9) is characterized by high loading of sucrose (91%), fructose  
605 (35%), and inositol (33%); these sugar species are associated with airborne pollen sources.  
606 Previous studies have also reported that sucrose is an excellent tracer for airborne pollen grains  
607 of flowering plants (Pacini, 2000; Graham et al., 2003; Wang et al., 2008; Medeiros et al.,  
608 2006). Fructose is well correlated with inositol ( $r=0.57$ ), indicating a similar origin for both  
609 sugar species (Table 2). Two prominent peaks of sucrose, fructose, and inositol, which  
610 appeared in late winter to early spring or summer, also indicate a similar source of those sugars.  
611 Contributions of sucrose (pollen factor) in winter (39.5%; Figure 6a) and spring (36%; Figure  
612 6b) are supported the sources of airborne pollen for sucrose in Chichijima Island. The sucrose  
613 contribution (soil dust factor) in non-flowering seasons, i.e., summer (17.1%; Figure 6c) and  
614 autumn (8.4%; Figure 6d), indicates different sources for sucrose in Chichijima aerosols.

615 According to the seasonal PMF analysis (Figure 6), we termed additional sources of sucrose in  
616 Chichijima Island as soil dust factor as well as pollen factor.

617 As seen in Figure 6a, b, c and d, PMF analysis for seasonal source identification  
618 indicated variable contributions of individual SCs in different seasons according to their  
619 seasonal source origin. In winter (Figure 6a), airborne pollen (39.5%) contributed highest  
620 followed by vegetation, microbial, fungal (mixed) (31.2%), biomass burning (18.8%), and  
621 microbial (10.5%) sources. However, in spring, vegetation, microbial, and fungal (mixed)  
622 sources (37.2%) contributed almost equal to the airborne pollen (36.0%) followed by  
623 vegetation (21.2%) and biomass burning (6.3%) sources. The vegetation, microbial, fungal  
624 (mixed) (54.2%), fungal (25.2%), soil particles (17.1%), and biomass burning (3.8%) sources  
625 are characterized to maximize in summer. Similar to summer, vegetation and fungal (mixed)  
626 sources (71.2%) are also leading to the contribution of total SCs followed by microbial  
627 (16.4%), soil particles (8.4%), and biomass burning (4.1%) in total SCs observed in autumn for  
628 Chichijima aerosols.

629 Overall, average contributions of each factor to measured SCs as resolved by the PMF  
630 analyses are shown in Figure 10. Fungal and microbial factor accounts for 41% of total SCs  
631 measured. The emission from microbes including fungal spores was found as a dominant  
632 contributor to total SCs. Mixed factor (27%) indicates a common involvement of fungal,  
633 microbial, and vegetation sources. Figure 11 shows annual trends in % contributions of five  
634 source factors to SCs in Chichijima aerosols. Fungal and microbial factor, and mixed factor  
635 contributed higher than other sources for SCs during 2001 to 2013. However, no clear trends in  
636 annual % contributions were observed for both source factors during thirteen-year study period.  
637 The sugar species assigned as pollen tracers were found to contribute 18% in pollen factor.  
638 Vegetation accounts for 11% of total SCs, indicating less emission from vegetation as  
639 compared to fungi and microbes. As indicated by BB factor, biomass-burning source  
640 contributes only 3% of total SCs.

641 Interestingly, we found an increasing trend in % contribution of vegetation, pollen, and  
642 BB factors to SCs in 2006 to 2013 (see Figure 11). Sugar components, which are contributed  
643 from pollen (sucrose, fructose, and inositol), vegetation (glucose and fructose), and biomass  
644 burning sources (levoglucosan, galactosan, and mannosan), also show a similar increasing  
645 trend for the period of 2006 to 2013 (Figure 7). The increased annual trends of BB and pollen  
646 factors might be due to an enhanced long-range transport of airborne pollens and biomass  
647 burning products from the Asian continent to the western North Pacific under the influence of  
648 strong westerly winds.

649

#### 650 **4 Summary and conclusions**

651 We reported thirteen years of temporal, seasonal and decadal trends of sugar compounds (SCs)  
652 measured in the aerosol samples collected at Chichijima Island in the western North Pacific, an  
653 outflow region of Asian aerosols. The high abundances of total SCs and primary sugars are  
654 found during summer, whereas sugar alcohols are almost equally distributed during summer  
655 and autumn. The seasonal distributions of arabitol, mannitol, and trehalose are strongly  
656 influenced by long-range atmospheric transport of bioaerosols associated with microbes such  
657 as fungi and bacteria and their metabolic activities under the influences of westerly winds and  
658 favorable meteorological conditions, including high RH and temperature in summer/autumn.  
659 Seasonal variation of sucrose is controlled by both locally emitted and long-range transported  
660 pollen from East Asia to the western North Pacific during spring bloom periods. On the other  
661 hand, the increased concentrations of sucrose and fructose during summer may be caused by  
662 the local activity of vegetation and possibly by long-range transport of plant root-associated  
663 soil dust particles from East and Southeast Asia. PMF analysis indicated specific sources for  
664 individual SCs during different seasons. The results clearly separated biogenic emissions into  
665 two parts as vegetation and microbes, including fungal species. The emissions from vegetation,

666 pollen, and microbial activities contributed about 97% of total measured SCs, with the  
667 remaining fraction being derived from biomass burning activities.

668 The concentration and seasonal variations of SCs at Chichijima Island are well  
669 regulated by atmospheric circulations, i.e., the westerly winds passing from the Asian continent  
670 during winter/spring and trade winds originated from the central Pacific Ocean during  
671 summer/autumn dominate over Chichijima Island in the western North Pacific. The  
672 meteorological parameters also significantly affect the concentrations and seasonal variations  
673 of SCs over Chichijima. Based on a decadal observation at Chichijima, we conclude that  
674 drastic increases in the concentrations of sugar alcohols and primary sugars during 2001-2003  
675 and 2010-2013 can be caused by an enhanced atmospheric transport of bioaerosols from East  
676 Asia to the western North Pacific.

677 Sugar components (SCs) are important compositions of organic aerosols worldwide and  
678 it is recognized as a significant factor affecting air quality and possibly climate. The outcomes  
679 of the thirteen-year study of SCs at Chichijima Island have an implication for global radiative  
680 forcing by scattering or absorbing light and also the activity of cloud condensation nuclei  
681 (CCN) in the western North Pacific that have a high sensitivity to global climate change due to  
682 an outflow region of the Asian dust and bioaerosols. The NASA Global Climate Change  
683 (<http://climate.nasa.gov/vital-signs/global-temperature/>) has reported a continuous increase in  
684 the global land/ocean temperature. The increasing annual trends in % contribution of  
685 vegetation factor to SCs suggested a significantly increased activity of local vegetation in  
686 Chichijima Island from 2006 to 2013, which could be involved with a recent global warming  
687 especially in the western North Pacific region.

688

## 689 **Acknowledgements**

690 We acknowledge the financial support by Japan Society for the Promotion of Science (JSPS)  
691 through grant-in-aid Nos. 19204055 and 24221001. The authors gratefully appreciate the

692 NOAA Air Resources Laboratory (ARL) for the provision of the HYSPLIT transport and  
693 dispersion model (<http://www.ready.noaa.gov>). The data for this paper are available upon  
694 request to the corresponding author (Kimitaka Kawamura, [kkawamura@isc.chubu.ac.jp](mailto:kkawamura@isc.chubu.ac.jp)).  
695

696 **References**

- 697 Andrews, J. T., W. N. Mode, and P. T. Davis (1980), Holocene climate based on pollen transfer-  
698 functions, *Eastern Canadian Arctic, Arct. Alp. Res.*, 12, 41-64.
- 699 Baker, H. G., I. Baker, S. A. Hodges (1998), Sugar composition of nectars and fruits consumed  
700 by birds and bats in the tropics and subtropics, *Biotropica*. 30, 559-586.
- 701 Bauer, H., E. Schueller, G. Weinke, A. Berger, R. Hitzenberger, I. L. Marr, and H. Puxbaum  
702 (2008a), Significant contributions of fungal spores to the organic carbon and to the  
703 aerosol mass balance of the urban atmospheric aerosol, *Atmos. Environ.*, 42(22), 5542-  
704 5549.
- 705 Bauer, H., M. Claeys, R. Vermeylen, E. Schueller, G. Weinke, A. Berger, and H. Puxbaum  
706 (2008b), Arabitol and mannitol as tracers for the quantification of airborne fungal spores,  
707 *Atmos. Environ.*, 42(3), 588-593.
- 708 Bendle, J., K. Kawamura, K. Yamazaki, and T. Niwai (2007), Latitudinal distribution of  
709 terrestrial lipid biomarkers and n-alkane compound-specific stable carbon isotope ratios  
710 in the atmosphere over the western Pacific and Southern Ocean, *Geochim. Cosmochim.*  
711 *Acta*, 71(24), 5934-5955.
- 712 Bielecki, R. L. (1995), Onset of phloem export from senescent petals of Daylily, *Plant Physiol.*,  
713 109(2), 557-565.
- 714 Bourgeois, J. C., K. Gajewski, and R. M. Koerner (2001), Spatial patterns of pollen deposition  
715 in arctic snow, *J. Geophys. Res.*, 106, 5255-5265.
- 716 Bremer, G. B. (1995), Lower marine fungi (Labyrinthulomycetes) and the decay of mangrove  
717 leaf-litter, *Hydrobiologia*, 304(3), 243-245.
- 718 Brown, J. K. M., and M. S. Hovmoller (2002), Epidemiology—Aerial dispersal of pathogens on  
719 the global and continental scales and its impact on plant disease, *Science*, 297(5581),  
720 537-541.
- 721 Burshtein, N., N. Lang-Yona, and Y. Rudich (2011), Ergosterol, arabitol and mannitol as tracers  
722 for biogenic aerosols in the eastern Mediterranean, *Atmos. Chem. Phys.*, 11(2), 829-839.
- 723 Bzdusek P.A., E. R. Christensen, C. M. Lee, U. Pakadeesusuk, D. C. Freedman, (2006). PCB  
724 congeners and dechlorination in sediments of Lake Hartwell, South Carolina, determined  
725 from cores collected in 1987 and 1988. *Environ. Sci. Technol.*, 40, 109-119.
- 726 Campbell, I. D., K. McDonald, M. Flannigan, and J. Kringayark (1999), Long-distance transport  
727 of pollen into the Arctic, *Nature*, 399, 29- 30.
- 728 Carvalho, A., C. Pio, and C. Santos (2003), Water-soluble hydroxylated organic compounds in  
729 German and Finnish aerosols, *Atmos. Environ.*, 37(13), 1775-1783.
- 730 Chen, J., K. Kawamura, C. Q. Liu, and P. Q. Fu (2013), Long-term observations of saccharides  
731 in remote marine aerosols from the western North Pacific: A comparison between 1990-  
732 1993 and 2006-2009 periods, *Atmos. Environ.*, 67, 448-458.
- 733 Cowie, G. L., and J. I. Hedges (1984), Carbohydrate sources in a coastal marine-environment,  
734 *Geochim. Cosmochim. Acta*, 48(10), 2075-2087.
- 735 Dahlman, L., J. Persson, T. Nasholm, and K. Palmqvist (2003), Carbon and nitrogen distribution  
736 in the green algal lichens *Hypogymnia physodes* and *Platismatia glauca* in relation to  
737 nutrient supply, *Planta*, 217(1), 41-48.
- 738 Duce, R. A., C. K. Unni, B. J. Ray, J.M. Prospero, J.T. Merrill (1980), Long-range atmospheric



- 739 transport of soil dust from Asia to the tropical North Pacific: temporal variability,  
740 Science, 209, 1522–1524.
- 741 Elbein, A. D. (1974), The metabolism of  $\alpha$ ,  $\alpha$ -trehalose, *Adv. Carboh. Chem. and Biochem.*, 30,  
742 227–256.
- 743 Elbert, W., P. E. Taylor, M. O. Andreae, and U. Pöschl (2007), Contribution of fungi to primary  
744 biogenic aerosols in the atmosphere: wet and dry discharged spores, carbohydrates, and  
745 inorganic ions, *Atmos. Chem. Phys.*, 7(17), 4569-4588.
- 746 Elliot S., Blake D.R., Duce R.A., Lai C.A., McCreary I., McNair L.A., Rowland F.S., Russell  
747 A.G., Streit G.E., and Turco R.P. Motorization of China implies changes in pacific air  
748 chemistry and primary production. *Geophys. Res. Letts.* 24, 2671 -2674, 1997.
- 749 Filippo, P. D., D. Pomata, C. Riccardi, F. Buiarelli, and C. Perrino (2013), Fungal contribution  
750 to size-segregated aerosol measured through biomarkers, *Atmos. Environ.*, 64,132-140.
- 751 Fraser, M. P., and K. Lakshmanan (2000), Using levoglucosan as a molecular marker for the  
752 long-range transport of biomass combustion aerosols, *Environ. Sci. Technol.*, 34(21),  
753 4560-4564.
- 754 Fu, P. Q., K. Kawamura, M. Kobayashi, and B. R. T. Simoneit (2012), Seasonal variations of  
755 sugars in atmospheric particulate matter from Gosan, Jeju Island: Significant  
756 contributions of airborne pollen and Asian dust in spring, *Atmos. Environ.*, 55, 234-239.
- 757 Fuzzi, S., et al. (2007), Overview of the inorganic and organic composition of size-segregated  
758 aerosol in Rondonia, Brazil, from the biomass-burning period to the onset of the wet  
759 season, *J. Geophys. Res.-Atmos.*, 112(D1), doi:10.1029/2005jd006741.
- 760 Graham, B., O. L. Mayol-Bracero, P. Guyon, G. C. Roberts, S. Decesari, M. C. Facchini, P.  
761 Artaxo, W. Maenhaut, P. Koll, and M. O. Andreae (2002), Water-soluble organic  
762 compounds in biomass burning aerosols over Amazonia - 1. Characterization by NMR  
763 and GC-MS, *J. Geophys. Res.-Atmos.*, 107(D20), doi:10.1029/2001jd000336.
- 764 Graham, B., P. Guyon, P. E. Taylor, P. Artaxo, W. Maenhaut, M. M. Glovsky, R. C. Flagan, and  
765 M. O. Andreae (2003), Organic compounds present in the natural Amazonian aerosol:  
766 Characterization by gas chromatography-mass spectrometry, *J. Geophys. Res.-Atmos.*,  
767 108(D24), doi:10.1029/2003jd003990.
- 768 Griffin, D. W., et al. (2001), African desert dust in the Caribbean atmosphere: Microbiology and  
769 public health, *Aerobiologia*, 17, 203–213.
- 770 Griffin, D. W., et al. (2003), Atmospheric microbiology in the northern Caribbean during  
771 African dust events, *Aerobiologia*, 19, 143–157.
- 772 Griffin, D. W., (2007), Atmospheric movement of microorganisms in clouds of desert dust and  
773 implications for human health, *Clin. Microbiol. Rev.* 20, 459–477.
- 774 Hackl, E., G. Bachmann, and S. Zechmeister-Boltenstern (2000), Soil microbial biomass and  
775 rhizosphere effects in natural forest stands, *Phyton.-Ann. Rei. Bot. A*, 40(4), 83-90.
- 776 Hader, J. D., T. P. Wright, and M. D. Petters (2014), Contribution of pollen to atmospheric ice  
777 nuclei concentrations, *Atmos. Chem. Phys.*, 14, 5433-5449.
- 778 Hicks, S., H. Tinsley, A. Huusko, C. Jensen, M. Hättestrand, A. Gerasimides, and E. Kvavadze  
779 (2001), Some comments on spatial variation in arboreal pollen deposition: First records  
780 from the Pollen Monitoring Programme (PMP), *Rev. Palaeobot. Palynol.*, 117, 183-194.
- 781 Hirst J. M., O. J. Stedman, and W. H. Hogg (1967), Long-distance spore transport: Methods of  
782 measurement, vertical spores profile and the detection of immigrant spores, *J. Gen.*

- 783 Microbiol. 48, 329-355.
- 784 Hjelmroos, M., and L. G. Franzen (1994), Implications or recent long distance pollen transport  
785 events for the interpretation of fossil pollen records in Fennoscandia, *Rev. Palaeobot.*  
786 *Palynol.*, 82, 175-189.
- 787 Hua, N.-P. et al. (2007), Detailed identification of desert-originated bacteria carried by Asian  
788 dust storms to Japan, *Aerobiologia*, 23, 291-298.
- 789 Hyde, K. D., E. B. G. Jones, E. Leano, S. B. Pointing, A. D. Poonyth, and L. L. P. Vrijmoed  
790 (1998), Role of fungi in marine ecosystems, *Biodivers. Conserv.*, 7(9), 1147-1161.
- 791 Ibrahim, M., A. B. Rabah, B. Liman, and N. T. Ibrahim (2011), Effect of temperature and  
792 relative humidity on the growth of *Helminthosporium fulvum*, *Nigerian J. Basic Appli.*  
793 *Sci.*, 19(1) 127- 129.
- 794 Ion, A. C., R. Vermeylen, I. Kourtchev, J. Cafmeyer, X. Chi, A. Gelencser, W. Maenhaut, and  
795 M. Claeys (2005), Polar organic compounds in rural PM(2.5) aerosols from K-pusztá,  
796 Hungary, during a 2003 summer field campaign: Sources and diel variations, *Atmos.*  
797 *Chem. Phys.*, 5, 1805-1814.
- 798 Iwasaka, Y., et al. (1983), The transport and spacial scale of Asian dust-storm clouds: a case  
799 study of the dust-storm event of April 1979, *Tellus*, 35B, 189–196.
- 800 Jaffe, D., et al. (1999), Transport of Asian air pollution to North America, *Geophys. Res. Lett.*,  
801 26(6), 711–714.
- 802 Jaffe, D., I. McKendry, T. Anderson, and H. Price (2003), Six “new” episodes of trans-Pacific  
803 transport of air pollutants, *Atmos. Environ.*, 37(3), 391–404.
- 804 Jaffe, D.A., Mahura A., Kelley, J., Atkins J., Novelli P.C. and Merrill J. Impact of Asian  
805 Emissions on the Remote North Pacific Atmosphere: Interpretation of CO Data from  
806 Shemya, Guam, Midway and Mauna Loa. *J. Geophys. Res.* 23, 28,627-28,636, 1997.
- 807 Jeon, E.-M. et al. (2011), Impact of Asian dust events on airborne bacterial community assessed  
808 by molecular analyses, *Atmos. Environ.* 45, 4313–4321.
- 809 Jia, Y. L., A. L. Clements, and M. P. Fraser (2010), Saccharide composition in atmospheric  
810 particulate matter in the southwest US and estimates of source contributions, *J. Aerosol*  
811 *Sci.*, 41(1), 62-73.
- 812 Jones, E.B.G. (ed.) (1976), *Recent Advances in Aquatic Mycology*, London: Elek Science.
- 813 Jones, E.B.G., and J. I. Mitchell (1996), Biodiversity of marine fungi, In *Biodiversity:*  
814 *International Biodiversity Seminar* (A. Cimerman and N. Gunde-Cimerman, eds), pp. 31-  
815 42. Ljubljana: National Inst. Chemistry and Slovenia National Commission for UNESCO.
- 816 Juntto S and P. Paatero (1994), Analysis of daily precipitation data by positive matrix  
817 factorization. *Environmetrics*, 5, 127–144.
- 818 Kanakidou, M., et al. (2005), Organic aerosol and global climate modelling: a review, *Atmos.*  
819 *Chem. Phys.*, 5, 1053-1123.
- 820 Kawamura, K., Y. Ishimura, and K. Yamazaki (2003), Four years' observations of terrestrial  
821 lipid class compounds in marine aerosols from the western North Pacific, *Global*  
822 *Biogeochem. Cy.*, 17(1), doi:10.1029/2001gb001810.
- 823 Kim, V. K., and C.L. Xiao (2005), Influence of culture media and environmental factors on  
824 mycelial growth and picnidial production of *Sphaeropsis pyripitrescens*, *Mycologia*,  
825 97(1): 25-32.

- 826 Kohlmeyer, J., and B. Volkmann-Kohlmeyer (1991), Illustrated key to the filamentous fungi,  
827 Bot. Mar. 34, 1-61.
- 828 Kohlmeyer, J., and E. Kohlmeyer (1979), Marine Mycology: The Higher Fungi, London:  
829 Academic Press.
- 830 Lacey, M. E., and J. S. West (2006), The Air Spora: a Manual for Catching and Identifying  
831 Airborne Biological Particles, pp. 32-33.
- 832 Lewis, D. H., and D. C. Smith (1967), Sugar alcohols (polyols) in fungi and green plants. I.  
833 Distribution physiology and metabolism, New Phytologist, 66(2), 143.
- 834 Loos, H., R. Kramer, H. Sahn, and G. A. Sprenger (1994), Sorbitol promotes growth of  
835 zymomonas mobilis in environments with high concentrations of sugar: evidence for a  
836 physiological function of glucose-fructose oxidoreductase in osmoprotection, J.  
837 Bacteriol., 176(24), 7688-7693.
- 838 Lu J., P. Jiang, et al. (2008), Assessing soil quality data by positive matrix factorization.  
839 Geoderma, 145, 259-266.
- 840 Ma, S. X., Z. Z. Wang, X. H. Bi, et al. (2009), Composition and source of saccharides in  
841 aerosols in Guangzhou, China, Chinese Sci. Bull., 54, 4500-4506.
- 842 Makra, L., T. Santa, I. Matyasovszky, A. Damialis, K. Karatzas, K. C. Bergmann, and D. Vokou  
843 (2010), Airborne pollen in three European cities: Detection of atmospheric circulation  
844 pathways by applying three-dimensional clustering of backward trajectories, J. Geophys.  
845 Res.-Atmos., 115, doi:10.1029/2010jd014743.
- 846 Malik, V. K., and S. Singh (2004), Effect of temperature and relative humidity on teliospore  
847 germination in *Ustilago hordei*, J. Mycol. Plant Pathol., 34, 410-411.
- 848 Martin, S. T., et al. (2010), Sources and Properties of Amazonian Aerosol Particles, Rev.  
849 Geophys., 48, doi:10.1029/2008rg000280.
- 850 Medeiros, P. M., M. H. Conte, J. C. Weber, and B. R. T. Simoneit (2006), Sugars as source  
851 indicators of biogenic organic carbon in aerosols collected above the Howland  
852 Experimental Forest, Maine, Atmos. Environ., 40(9), 1694-1705.
- 853 Medeiros, P. M., and B. R. T. Simoneit, (2008), Source profiles of organic compounds emitted  
854 upon combustion of green vegetation from temperate climate forests, Environ. Sci.  
855 Technol., 42, 8310-8316.
- 856 Miguel, A. G., Taylor P. E., House J., Glovsky M. M., and Flagan R. C. (2006), Meteorological  
857 influences on respirable fragment release from Chinese elm pollen, Aerosol Sci. Technol.  
858 40, 690-696.
- 859 Mims, S. A., and F. M. Mims (2003), Fungal spores are transported long distances in smoke  
860 from biomass fires, Atmos. Environ., 38, 651-655.
- 861 Miyazaki, Y., J. Jung, P. Fu, Y. Mizoguchi, K. Yamanoi, and K. Kawamura (2012), Evidence of  
862 formation of submicrometer water-soluble organic aerosols at a deciduous forest site in  
863 northern Japan in summer, J. Geophys. Res., 117, D19213, doi:10.1029/2012JD018250.
- 864 Mochida, M., A. Kawabata, K. Kawamura, H. Hatsushika, and K. Yamazaki (2003a), Seasonal  
865 variation and origins of dicarboxylic acids in the marine atmosphere over the western  
866 North Pacific, J. Geophys. Res.-Atmos., 108(D6), doi:10.1029/2002jd002355.
- 867 Mochida, M., K. Kawamura, N. Umemoto, M. Kobayashi, S. Matsunaga, H. J. Lim, B. J. Turpin,  
868 T. S. Bates, and B. R. T. Simoneit (2003b), Spatial distributions of oxygenated organic  
869 compounds (dicarboxylic acids, fatty acids, and levoglucosan) in marine aerosols over

- 870 the western Pacific and off the coast of East Asia: Continental outflow of organic  
871 aerosols during the ACE-Asia campaign, *J. Geophys. Res.-Atmos.*, 108(D23),  
872 doi:10.1029/2002jd003249.
- 873 Mochida, M., K. Kawamura, P. Q. Fu, and T. Takemura (2010), Seasonal variation of  
874 levoglucosan in aerosols over the western North Pacific and its assessment as a biomass-  
875 burning tracer, *Atmos. Environ.*, 44(29), 3511-3518.
- 876 Morris, C. E., D. G. Georgakopoulos, and D. C. Sands (2004), Ice nucleation active bacteria and  
877 their potential role in precipitation, *J. Phys. Iv.*, 121, 87-103.
- 878 Moss, S.T. (ed.) (1986), *The Biology of Marine Fungi*, Cambridge: Cambridge University Press.
- 879 Nakagiri, A., S. Y. Newell, T. Ito, and T. K. Tan (1996), Biodiversity and ecology of the  
880 oomycetous fungus, *Halophytophthora*, In *Biodiversity and the Dynamics of Ecosystems*.  
881 (DIWPA series. Vol.1) (I.M. Turner, C.H. Diong, S.S.L. Lim, and P.K.L. Ng, eds), pp.  
882 273-80. Tokyo: International Network for DIVERSITAS in Western Pacific and Asia.
- 883 Nolte, C. G., J. J. Schauer, G. R. Cass, and B. R. T. Simoneit (2001), Highly polar organic  
884 compounds present in wood smoke and in the ambient atmosphere, *Environ. Sci.*  
885 *Technol.*, 35(10), 1912-1919.
- 886 Paatero, P., and U. Tapper (1994), Positive Matrix Factorization - a Nonnegative Factor Model  
887 with Optimal Utilization of Error-Estimates of Data Values, *Environmetrics*, 5(2), 111-  
888 126.
- 889 Paatero, P. et al. (2002), Understanding and controlling rotations in factor analytic models,  
890 *Chemom. Intell. Lab. Syst.*, 60, 253-264.
- 891 Pacini, E. (2000), From anther and pollen ripening to pollen presentation, *Plant Syst. Evol.* 222,  
892 19-43.
- 893 Pashynska, V., R. Vermeylen, G. Vas, W. Maenhaut, and M. Claeys (2002), Development of a  
894 gas chromatographic/ion trap mass spectrometric method for the determination of  
895 levoglucosan and saccharidic compounds in atmospheric aerosols. Application to urban  
896 aerosols, *J. Mass Spectrom.*, 37(12), 1249-1257.
- 897 Pavuluri, C. M., K. Kawamura, E. Tachibana, and T. Swaminathan (2010), Elevated nitrogen  
898 isotope ratios of tropical Indian aerosols from Chennai: Implication for the origins of  
899 aerosol nitrogen in South and Southeast Asia, *Atmos. Environ.*, 44(29), 3597-3604.
- 900 Polissar A.V., P. K. Hopke, P. Paatero, Y. J. Kaufmann, D. K. Hall, B.A. Bodhaine, E.G. Dutton,  
901 J. M. Harris, (1999). The aerosol at Barrow, Alaska: long-term trends and source  
902 locations. *Atmos. Environ.*, 33, 2441-2458.
- 903 Prospero, J.M. and D.L. Savoie (1989), Effect of continental sources of nitrate concentrations  
904 over the Pacific Ocean, *Nature*, 339, 687- 689.
- 905 Prospero, J. M. et al. (2005), Interhemispheric transport of viable fungi and bacteria from Africa  
906 to the Caribbean with soil dust, *Aerobiologia*, 21, 1-19.
- 907 Rogge, W. F., P. M. Medeiros, and B. R. T. Simoneit (2006), Organic marker compounds for  
908 surface soil and fugitive dust from open lot dairies and cattle feedlots, *Atmos. Environ.*,  
909 40(1), 27-49.
- 910 Rogge, W. F., P. M. Medeiros, and B. R. T. Simoneit (2007), Organic marker compounds in  
911 surface soils of crop fields from the San Joaquin Valley fugitive dust characterization  
912 study, *Atmos. Environ.*, 41, 8183-8204.
- 913 Rousseau, D.-D., P. Schevin, J. Ferrier, D. Jolly, T. Andreasen, S. E. Ascanius, S. E. Hendriksen,

- 914 and U. Poulsen (2008), Long-distance pollen transport from North America to Greenland  
915 in spring, *J. Geophys. Res.-Biogeo.*, 113(G2), doi:10.1029/2007jg000456.
- 916 Rousseau, D.-D., D. Duzer, J.-L. Etienne, G. Cambon, D. Jolly, J. Ferrier, and P. Schevin (2004),  
917 Pollen record of rapidly changing air trajectories to the North Pole, *J. Geophys. Res.*, 109,  
918 D06116, doi:10.1029/2003JD003985.
- 919 Rousseau, D.-D., P. Schevin, D. Duzer, G. Cambon, J. Ferrier, D. Jolly, and U. Poulsen (2006),  
920 New evidence of long distance pollen transport to southern Greenland in late Spring, *Rev.*  
921 *Palaeobot. Palynol.*, 141, 277–286.
- 922 Schmidl, C., H. Bauer, A. Dattler, R. Hitzenberger, G. Weissenboeck, I. L. Marr, and H.  
923 Puxbaum (2008), Chemical characterisation of particle emissions from burning leaves,  
924 *Atmos. Environ.*, 42(40), 9070-9079.
- 925 Seinfeld, J. H., et al., (2004), ACE-ASIA - Regional climatic and atmospheric chemical effects  
926 of Asian dust and pollution, *Bull. Amer. Meteorol. Soc.*, 85(3), 367-380.
- 927 Sharma, R. and R. C. Rajak (2003), Keratinophilic fungi: Nature's keratin degrading machines,  
928 *Resonance*, 8, 28-30.
- 929 Simoneit, B. R. T. (2002), Biomass burning - A review of organic tracers for smoke from  
930 incomplete combustion, *Appl. Geochem.*, 17(3), 129-162.
- 931 Simoneit, B. R. T. (2004), Biomarkers (molecular fossils) as geochemical indicators of life, *Adv.*  
932 *Space. Res.*, 33(8), 1255-1261.
- 933 Simoneit, B. R. T., and V. O. Elias (2000), Organic tracers from biomass burning in  
934 atmospheric particulate matter over the ocean, *Mar. Chem.*, 69(3-4), 301-312.
- 935 Simoneit, B. R. T., V. O. Elias, M. Kobayashi, K. Kawamura, A. I. Rushdi, P. M. Medeiros, W.  
936 F. Rogge, and B. M. Didyk (2004a), Sugars-dominant water-soluble organic compounds  
937 in soils and characterization as tracers in atmospheric particulate matter, *Environ. Sci.*  
938 *Technol.*, 38(22), 5939-5949.
- 939 Simoneit, B. R. T., M. Kobayashi, M. Mochida, K. Kawamura, M. Lee, H. J. Lim, B. J. Turpin,  
940 and Y. Komazaki (2004b), Composition and major sources of organic compounds of  
941 aerosol particulate matter sampled during the ACE-Asia campaign, *J. Geophys. Res.-*  
942 *Atmos.*, 109(D19), doi:10.1029/2004jd004598.
- 943 Slinn, S. A., and W. G. N. Slinn (1980), Predictions for particle deposition on natural waters,  
944 *Atmos. Environ.*, 14, 1013-1016.
- 945 Soonthornnonda P. and E. R. Christensen (2008). Source apportionment of pollutants and flows  
946 of combined sewer wastewater. *Water Res.*, 42, 1989–1998.
- 947 Sosnoskie, L. M., T. M. Webster, D. Dales, G. C. Rains, T. L. Grey, and A. S. Culpepper (2009),  
948 Pollen grain size, density, and settling velocity for Palmer amaranth (*Amaranthus*  
949 *palmeri*), *Weed Science*, 57, 404-409. <http://dx.doi.org/10.1614/WS-08-157.1>.
- 950 Speranza, A., G. L. Calzoni, and E. Pacini (1997), Occurrence of mono- or disaccharides and  
951 polysaccharide reserves in mature pollen grains, *Sex. Plant Reprod.*, 10(2), 110–115.
- 952 Sullivan, A. P., N. Frank, D. M. Kenski, Jr., and J. L. Collett (2011), Application of high-  
953 performance anion-exchange chromatography-pulsed amperometric detection for  
954 measuring carbohydrates in routine daily filter samples collected by a national network: 2.  
955 Examination of sugar alcohols/polyols, sugars, and anhydrosugars in the upper Midwest,  
956 *J. Geophys. Res.* 116. <http://dx.doi.org/10.1029/2010JD014169>.
- 957 Talbot R.W. et al. (1997), Chemical characteristics of continental outflow from Asia to the

- 958 troposphere over the western Pacific Ocean during February-March 1994: Results from  
959 PEM -West B. *J. Geophys. Res.*, 102, 28,255-28,274, 1997.
- 960 Tominaga, S., K. Matsumoto, N. Kaneyasu, A. Shigihara, K. Katono, N. Igawa (2011),  
961 Measurements of particulate sugars at urban and forested suburban sites, *Atmos. Environ.*  
962 45, 2335-2339.
- 963 Uno, I., K. Eguchi, K. Yumimoto, T. Takemura, A. Shimizu, M. Uematsu, Z. Y. Liu, Z. F.  
964 Wang, Y. Hara, and N. Sugimoto (2009), Asian dust transported one full circuit around  
965 the globe, *Nat. Geosci.*, 2(8), 557-560.
- 966 Verma, S. K., K. Kawamura, J. Chen, P. Q. Fu and C. Zhu (2015), Thirteen years observation of  
967 biomass-burning organic tracers over Chichijima Island in the western North Pacific: An  
968 outflow region of Asian aerosols, *J. Geophys. Res. Atmos.*, 120,  
969 doi:10.1002/2014JD022224. .
- 970 Wan, E. C. H., and J. Z. Yu (2007), Analysis of sugars and sugar polyols in atmospheric  
971 aerosols by chloride attachment in liquid chromatography/negative ion electrospray mass  
972 spectrometry, *Environ. Sci. Technol.*, 41(7), 2459-2466.
- 973 Wang, G. H., C. L. Chen, J. J. Li, B. H. Zhou, M. J. Xie, S. Y. Hu, K. Kawamura, and Y. Chen  
974 (2011), Molecular composition and size distribution of sugars, sugar-alcohols and  
975 carboxylic acids in airborne particles during a severe urban haze event caused by wheat  
976 straw burning, *Atmos. Environ.*, 45(15), 2473-2479,
- 977 Wang, G. H., K. Kawamura, and M. Lee (2009), Comparison of organic compositions in dust  
978 storm and normal aerosol samples collected at Gosan, Jeju Island, during spring 2005,  
979 *Atmos. Environ.*, 43(2), 219-227.
- 980 Wiemken, A. (1990), Trehalose in Yeast, Stress Protectant Rather Than Reserve Carbohydrate,  
981 *Anton. Leeuw. Int. J. G.*, 58(3), 209-217.
- 982 Wright, T. P., J. D. Hader, G. R. McMeeking, and M. D. Peters (2014), High relative humidity  
983 as a trigger for widespread release of ice Nuclei, *Aerosol Sci. Technol.*, 48, 11, i-v, DOI:  
984 10.1080/02786826.2014.968244.
- 985 Xie Y. and C. M. Berkowitz (2006), The use of positive matrix factorization with conditional  
986 probability functions in air quality studies: an application to hydrocarbon emissions in  
987 Houston, Texas. *Atmos. Environ.*, 40, 3070– 3091.
- 988 Xu, W. Y., et al. (2011), Characteristics of pollutants and their correlation to meteorological  
989 conditions at a suburban site in the North China Plain, *Atmos. Chem. Phys.*, 11(9), 4353-  
990 4369.
- 991 Yamaguchi, N., T. Ichijo, A. Sakotani, T. Baba, and M. Nasu (2012), Global dispersion of  
992 bacterial cells on Asian dust, *Sci. Rep.*, 2, DOI: 10.1038/srep00525.
- 993 Yang, Y. H., C. Y. Chan, J. Tao, M. Lin, G. Engling, Z. S. Zhang, T. Zhang, and L. Su (2012),  
994 Observation of elevated fungal tracers due to biomass burning in the Sichuan Basin at  
995 Chengdu City, China, *Sci. Total Environ.*, 431, 68–77.
- 996 Yttri, K. E., C. Dye, and G. Kiss (2007), Ambient aerosol concentrations of sugars and sugar-  
997 alcohols at four different sites in Norway, *Atmos. Chem. Phys.*, 7(16), 4267-4279.
- 998 Zhang, T., Engling, G., Chan, C.-Y., Zhang, Y.-N., Zhang, Z.-S., Lin, M., Sang, X.-F., Li, Y.D.,  
999 Li, Y.-S., 2010. Contribution of fungal spores to particulate matter in a tropical rainforest.  
1000 *Environ. Res. Lett.* 5. doi:10.1088/1748-9326/1085/1082/ 024010.
- 1001 Zhou, L., E. Kim et al., (2004), Advanced factor analysis on Pittsburgh particle size distribution  
1002 data, *Aerosol Sci. Technol.*, 38, 118-132.

1003 Zhu, C., K. Kawamura, and B. Kunwar (2015), Organic tracers of primary biological aerosol  
1004 particles at subtropical Okinawa Island in the western North Pacific Rim, *J. Geophys.*  
1005 *Res. Atmos.*, 120, 5504–5523.

1006  
1007  
1008  
1009  
1010  
1011  
1012  
1013  
1014  
1015  
1016  
1017  
1018  
1019  
1020  
1021  
1022  
1023  
1024  
1025  
1026  
1027  
1028  
1029  
1030  
1031  
1032  
1033  
1034  
1035  
1036  
1037  
1038

1039 **Figure Captions**

1040 **Figure 1.** Geographical location of Chichijima Island (27°04'N; 142°13'E; 254 m, asl) in the  
1041 western North Pacific.

1042 **Figure 2.** The monthly variation of the meteorological parameters over Chichijima Island  
1043 during 2001-2013 (The error bars denote the standard deviations).

1044 **Figure 3.** The seasonal ten-day air mass backward trajectories over Chichijima for 2012  
1045 (winter: Dec-Feb, spring: Mar-May, summer: Jun-Aug, autumn: Sep-Nov). The trajectory  
1046 calculations were performed everyday starting at Chichijima Island.

1047 **Figure 4.** Temporal plots for the concentrations ( $\text{ng m}^{-3}$ ) of sugar compounds in Chichijima  
1048 aerosol samples collected for 2001-2013 in the western North Pacific.

1049 **Figure 5.** Monthly mean concentrations ( $\text{ng m}^{-3}$ ) of sugar compounds in aerosol samples from  
1050 Chichijima Island in the western North Pacific during 2001-2013.

1051 **Figure 6.** Seasonal source contributions to sugar compounds from various sources based on  
1052 PMF analyses. (BB – biomass-burning; Mixed – vegetation, fungal and microbial sources).

1053 **Figure 7.** Annual mean concentrations ( $\text{ng m}^{-3}$ ) of sugar compounds in aerosol samples  
1054 collected from Chichijima Island in the western North Pacific during 2001-2013.

1055 **Figure 8.** The seasonal concentrations of anhydrosugars (biomass burning tracers), primary  
1056 sugars and sugar alcohols measured in Chichijima aerosols during three periods, i.e., P-I  
1057 (1990-1993), P-II (2001-2003) and P-III (2010-2013).

1058 **Figure 9.** PMF analyses of sugar compounds in Chichijima aerosols based on the 2001-2013  
1059 data set. (BB – biomass-burning; Mixed – vegetation, fungal and microbial sources).

1060 **Figure 10.** Source contributions to sugar compounds from various sources based on PMF  
1061 analyses. (BB – biomass-burning; Mixed – vegetation, fungal and microbial sources).

1062 **Figure 11.** Annual trends in % contributions of five source factors: (a) vegetation, (b) fungal  
1063 and microbial, (c) mixed, (d) biomass burning (BB), and (e) pollen factors to SCs in  
1064 Chichijima aerosols. The data of 2005 are not plotted due to limited data points.

1065

1066



1067  
1068  
1069  
1070  
1071  
1072  
1073  
1074  
1075

**Figure 1.**

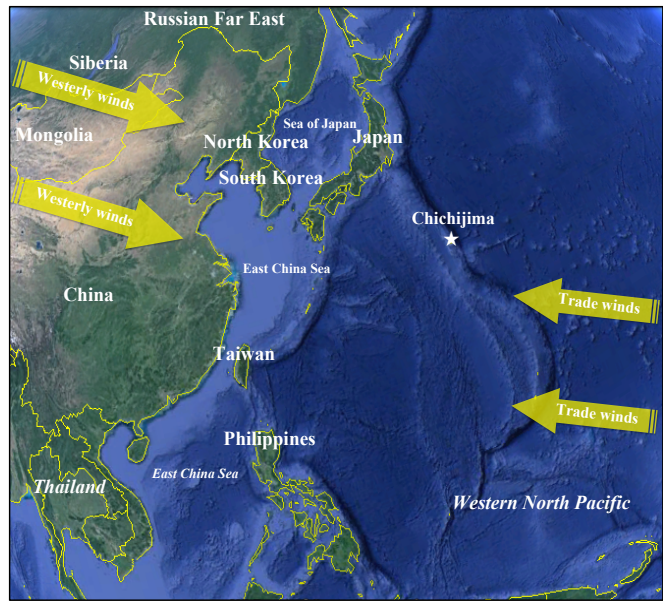

1087  
1088  
1089  
1090  
1091  
1092  
1093  
1094  
1095  
1096  
1097  
1098  
1099  
1100  
1101

1102  
1103  
1104  
1105  
1106  
1107  
1108

Figure 2.

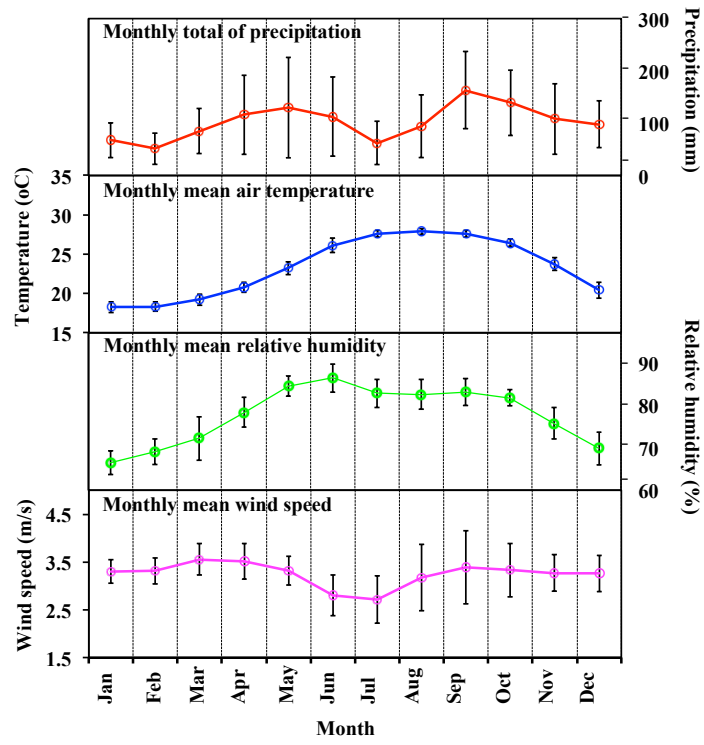

1109  
1110  
1111  
1112  
1113  
1114  
1115

1116  
1117  
1118  
1119  
1120  
1121  
1122  
1123  
1124  
1125  
1126

Figure 3.

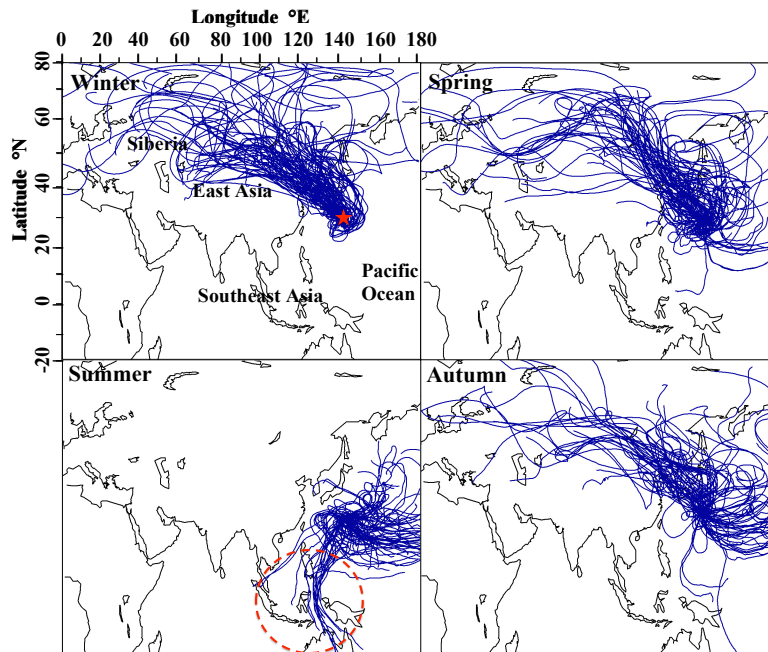

1127  
1128  
1129  
1130  
1131  
1132  
1133  
1134  
1135  
1136  
1137  
1138  
1139

1140  
1141  
1142  
1143  
1144  
1145  
1146

Figure 4.

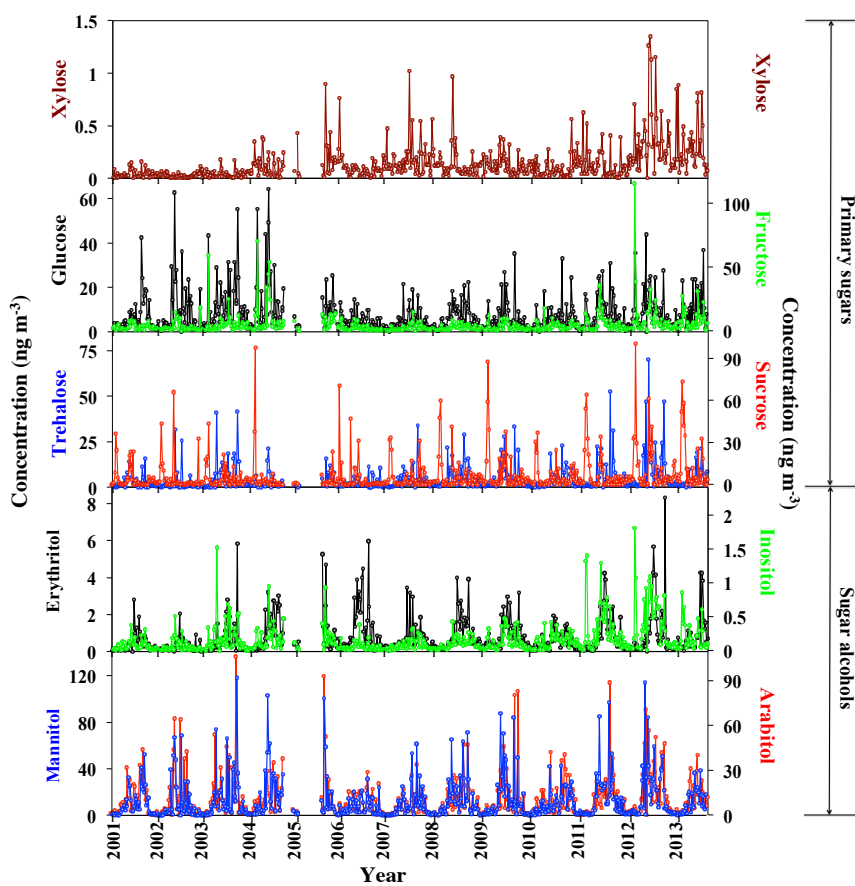

1147  
1148  
1149

1150  
1151  
1152  
1153  
1154  
1155  
1156  
1157  
1158  
1159  
1160

Figure 5.

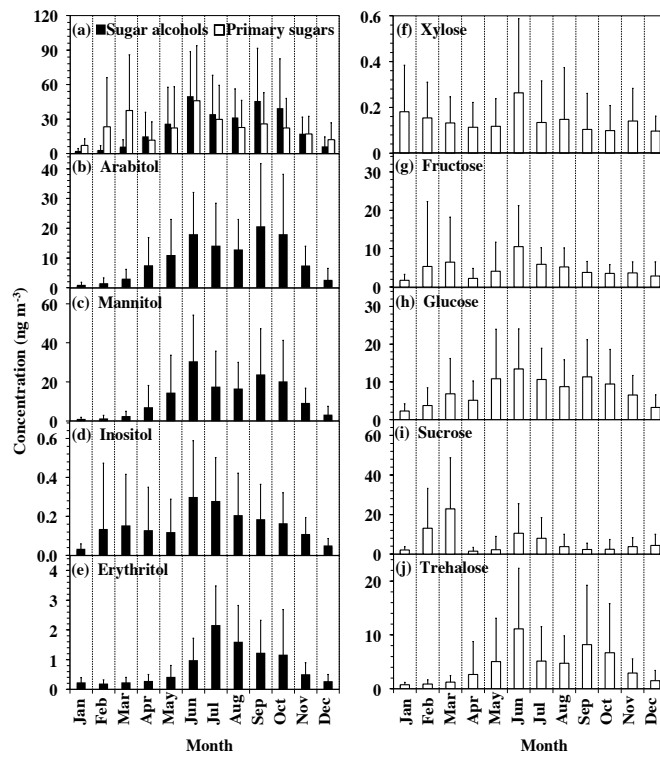

1161  
1162  
1163  
1164  
1165  
1166  
1167  
1168  
1169  
1170  
1171

1172  
 1173  
 1174  
 1175  
 1176  
 1177  
 1178  
 1179

Figure 6.

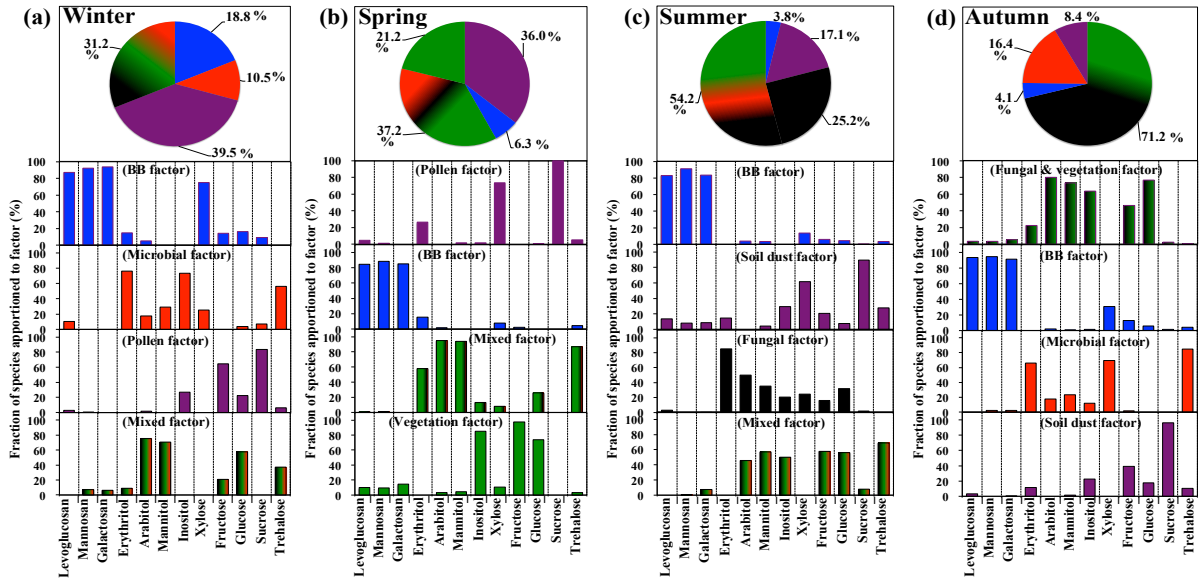

1180  
 1181  
 1182  
 1183  
 1184  
 1185  
 1186  
 1187  
 1188  
 1189  
 1190  
 1191  
 1192  
 1193  
 1194  
 1195  
 1196

1197  
1198  
1199  
1200  
1201  
1202  
1203  
1204

Figure 7.

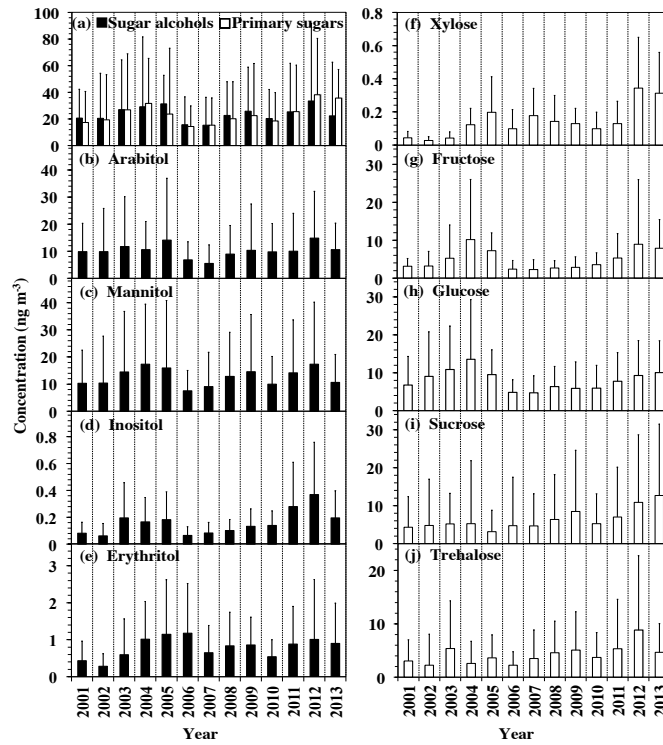

1205  
1206  
1207  
1208  
1209  
1210  
1211  
1212  
1213  
1214  
1215  
1216  
1217  
1218

1219  
 1220  
 1221  
 1222  
 1223  
 1224  
 1225  
 1226

Figure 8.

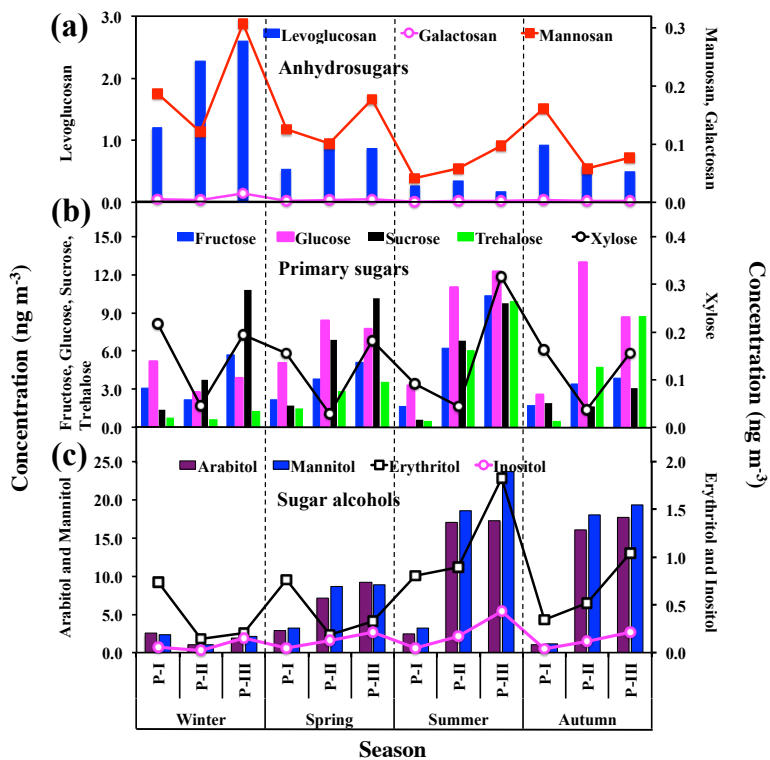

1227  
 1228  
 1229  
 1230  
 1231  
 1232  
 1233  
 1234  
 1235  
 1236  
 1237  
 1238  
 1239  
 1240



1241  
 1242  
 1243  
 1244  
 1245  
 1246  
 1247  
 1248  
 1249  
 1250

Figure 9.

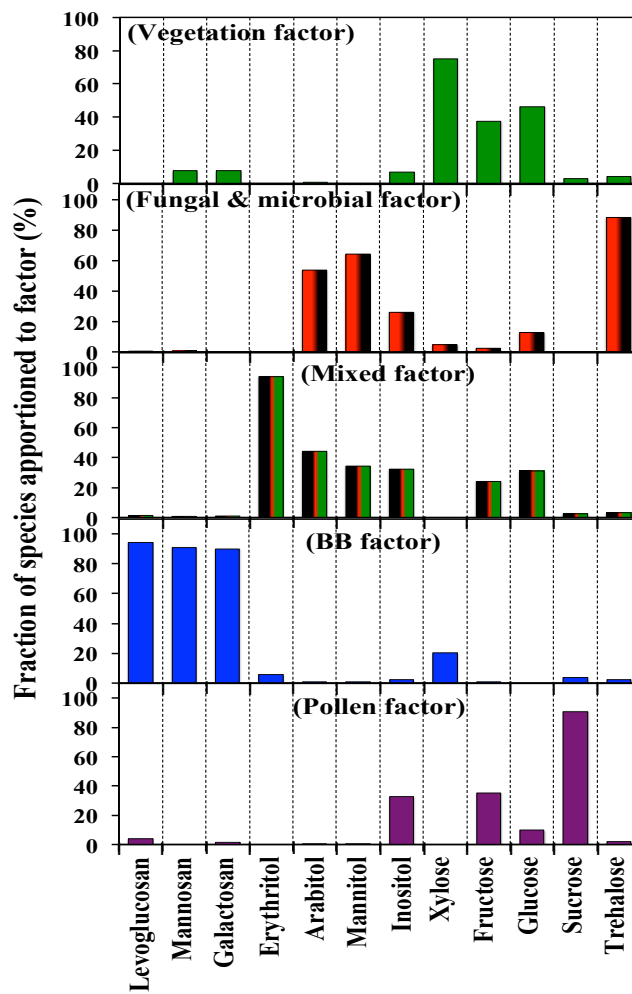

1251  
 1252  
 1253  
 1254  
 1255  
 1256  
 1257

1258  
1259  
1260  
1261  
1262  
1263  
1264  
1265  
1266  
1267  
1268  
1269  
1270  
1271

**Figure 10.**

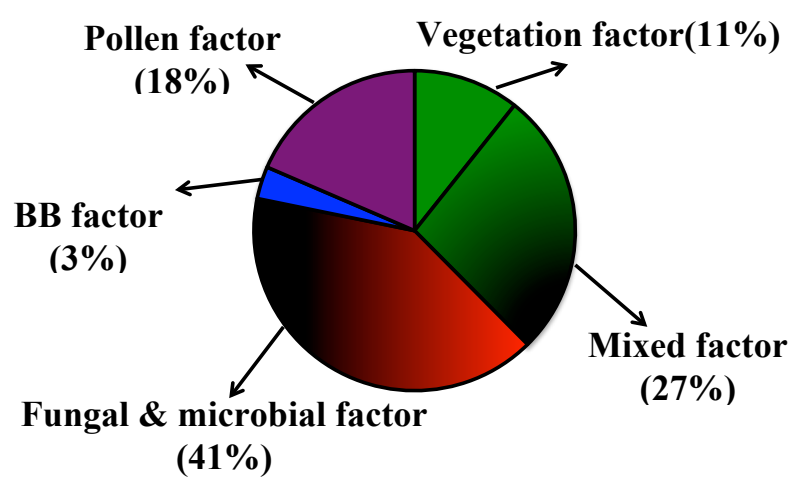

1272  
1273  
1274  
1275

1276  
1277  
1278  
1279  
1280  
1281  
1282  
1283  
1284

Figure 11.

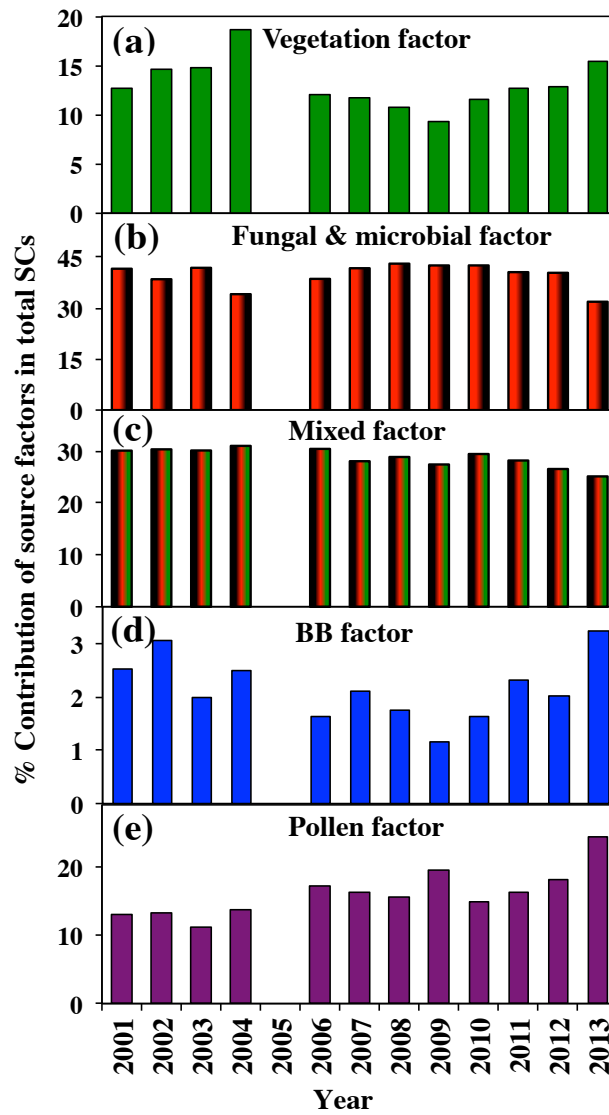

1285

1286  
1287  
1288

**Table 1.** Seasonal concentrations (ng m<sup>-3</sup>) of sugar compounds (SCs) in the aerosol samples collected at ChichiJima Island in the western North Pacific during 2001-2013.

| Sugars                  | Winter <sup>a</sup> (n=139) |                  |                  | Spring <sup>b</sup> (n=155) |                  |                  | Summer <sup>c</sup> (n=146) |                  |                  | Autumn <sup>d</sup> (n=150) |                  |                  | 2001-2013 (n=590) |                  |                  |
|-------------------------|-----------------------------|------------------|------------------|-----------------------------|------------------|------------------|-----------------------------|------------------|------------------|-----------------------------|------------------|------------------|-------------------|------------------|------------------|
|                         | Range                       | Mean±SD          | Med <sup>e</sup> | Range                       | Mean±SD          | Med <sup>e</sup> | Range                       | Mean±SD          | Med <sup>e</sup> | Range                       | Mean±SD          | Med <sup>e</sup> | Range             | Mean±SD          | Med <sup>e</sup> |
| <b>Primary sugars</b>   |                             |                  |                  |                             |                  |                  |                             |                  |                  |                             |                  |                  |                   |                  |                  |
| Xylose                  | 0.05-0.89                   | 0.14±0.15        | 0.12             | 0.001-0.56                  | 0.12±0.11        | 0.08             | 0.002-1.35                  | 0.18±0.26        | 0.08             | 0.004-0.89                  | 0.11±0.14        | 0.07             | 0.001-1.35        | 0.14±0.18        | 0.08             |
| Fructose                | 0.17-115                    | 3.36±10.2        | 1.38             | 0.03-70.4                   | 4.51±9.21        | 1.90             | 0.24-54.0                   | 7.25±7.63        | 5.23             | 0.22-13.0                   | 3.70±2.68        | 2.82             | 0.03-115          | 4.69±8.04        | 2.53             |
| Glucose                 | 0.27-23.3                   | 3.11±3.53        | 2.13             | 0.05-62.6                   | 7.68±10.3        | 4.36             | 0.23-64.3                   | 11.0±9.02        | 7.99             | 0.72-55.5                   | 9.25±8.63        | 5.77             | 0.05-64.3         | 7.79±8.80        | 4.73             |
| Sucrose                 | 0.02-73.4                   | 6.60±13.1        | 2.08             | 0.005-100                   | 8.80±18.0        | 1.30             | 0.003-66.0                  | 7.31±11.5        | 2.58             | 0.002-31.1                  | 2.76±4.35        | 1.14             | 0.002-100         | 6.43±12.9        | 1.71             |
| Trehalose               | 0.03-10.5                   | 1.03±1.26        | 0.72             | 0.006-47.2                  | 2.93±6.08        | 1.23             | 0.03-70.2                   | 7.06±8.49        | 4.46             | 0.04-52.5                   | 6.09±8.81        | 2.46             | 0.01-70.2         | 4.30±7.28        | 1.61             |
| <b>Σ Primary sugars</b> | <b>0.49-223</b>             | <b>14.2±28.2</b> |                  | <b>0.09±281</b>             | <b>24.2±43.8</b> |                  | <b>0.51-256</b>             | <b>32.8±36.9</b> |                  | <b>0.99-153</b>             | <b>22.0±24.6</b> |                  | <b>0.28-176</b>   | <b>23.3±25.7</b> |                  |
| <b>Sugar alcohols</b>   |                             |                  |                  |                             |                  |                  |                             |                  |                  |                             |                  |                  |                   |                  |                  |
| Erythritol              | 0.03-1.17                   | 0.23±0.18        | 0.18             | 0.008-2.25                  | 0.31±0.28        | 0.23             | 0.07-5.70                   | 1.55±1.21        | 1.18             | 0.05-8.32                   | 0.99±1.16        | 0.56             | 0.01-8.32         | 0.77±1.01        | 0.37             |
| Arabitol                | 0.12-21.2                   | 1.73±2.60        | 0.96             | 0.04-70.8                   | 7.13±9.50        | 4.44             | 0.24-64.5                   | 15.1±12.9        | 12.0             | 0.57-106                    | 15.8±18.3        | 8.83             | 0.04-106          | 9.99±13.6        | 4.97             |
| Mannitol                | 0.10-23.9                   | 1.89±2.81        | 1.11             | 0.16-114                    | 7.95±13.8        | 4.07             | 0.25-104                    | 21.7±19.7        | 16.9             | 0.59-118                    | 18.2±19.9        | 9.15             | 0.10-118          | 12.5±17.5        | 5.54             |
| Inositol                | 0.01-1.81                   | 0.07±0.20        | 0.03             | 0.008-1.51                  | 0.13±0.22        | 0.06             | 0.01-1.29                   | 0.26±0.25        | 0.17             | 0.01-0.93                   | 0.16±0.15        | 0.10             | 0.01-1.81         | 0.16±0.22        | 0.08             |
| <b>Σ Sugar alcohols</b> | <b>0.26-48.2</b>            | <b>3.93±5.79</b> |                  | <b>0.22-188</b>             | <b>15.5±23.8</b> |                  | <b>0.56-175</b>             | <b>38.6±34.1</b> |                  | <b>1.22-234</b>             | <b>35.1±39.5</b> |                  | <b>0.37-231</b>   | <b>23.4±30.8</b> |                  |
| <b>Σ SCs</b>            | <b>0.75-272</b>             | <b>18.2±34.0</b> | <b>10.6</b>      | <b>0.31-469</b>             | <b>39.8±67.6</b> | <b>18.2</b>      | <b>1.07-431</b>             | <b>71.5±70.9</b> | <b>50.7</b>      | <b>2.21-387</b>             | <b>57.0±64.2</b> | <b>31.1</b>      | 1.23-339          | 46.7±49.5        | 30.9             |

1289  
1290  
1291  
1292  
1293  
1294  
1295

<sup>a</sup> Winter (December-February), <sup>b</sup> Spring (March-May), <sup>c</sup> Summer (June-August) and <sup>d</sup> Autumn (September-November); Med.=Median

1297  
1298  
1299

**Table 2.** Pearson correlation coefficients (r) for the dataset of sugars in Chichijima aerosols during 2001-2013 (n = 590).

|                     | Levoglucozan <sup>a</sup> | Mannosan <sup>a</sup> | Galactosan <sup>a</sup> | Erythritol | Arabitol | Mannitol | Inositol | Xylose | Fructose | Glucose | Sucrose | Trehalose |
|---------------------|---------------------------|-----------------------|-------------------------|------------|----------|----------|----------|--------|----------|---------|---------|-----------|
| <b>Levoglucozan</b> | 1.00                      |                       |                         |            |          |          |          |        |          |         |         |           |
| <b>Mannosan</b>     | 0.79                      | 1.00                  |                         |            |          |          |          |        |          |         |         |           |
| <b>Galactosan</b>   | 0.55                      | 0.58                  | 1.00                    |            |          |          |          |        |          |         |         |           |
| <b>Erythritol</b>   | -0.18                     | -0.12                 | -0.16                   | 1.00       |          |          |          |        |          |         |         |           |
| <b>Arabitol</b>     | -0.16                     | -0.09                 | -0.16                   | 0.48       | 1.00     |          |          |        |          |         |         |           |
| <b>Mannitol</b>     | -0.18                     | -0.12                 | -0.17                   | 0.49       | 0.88     | 1.00     |          |        |          |         |         |           |
| <b>Inositol</b>     | -0.06                     | -0.02                 | 0.10                    | 0.35       | 0.49     | 0.58     | 1.00     |        |          |         |         |           |
| <b>Xylose</b>       | 0.20                      | 0.32                  | 0.34                    | 0.15       | 0.18     | 0.23     | 0.42     | 1.00   |          |         |         |           |
| <b>Fructose</b>     | 0.02                      | 0.08                  | 0.26                    | 0.17       | 0.16     | 0.28     | 0.57     | 0.31   | 1.00     |         |         |           |
| <b>Glucose</b>      | -0.11                     | 0.00                  | -0.06                   | 0.32       | 0.63     | 0.72     | 0.53     | 0.19   | 0.57     | 1.00    |         |           |
| <b>Sucrose</b>      | 0.05                      | 0.07                  | 0.18                    | -0.02      | -0.06    | 0.01     | 0.40     | 0.26   | 0.30     | 0.14    | 1.00    |           |
| <b>Trehalose</b>    | -0.10                     | -0.05                 | -0.10                   | 0.33       | 0.73     | 0.80     | 0.55     | 0.33   | 0.22     | 0.54    | 0.13    | 1.00      |

<sup>a</sup> data from Verma et al. (2015)

1300  
1301  
1302  
1303  
1304  
1305  
1306  
1307  
1308  
1309  
1310  
1311  
1312  
1313

1314  
 1315  
 1316  
 1317  
 1318

**Table 3.** Comparisons of seasonal concentrations ( $\text{ng m}^{-3}$ ) of primary sugars and relative contributions (%) of sugar compounds (SCs) in total SCs in Chichijima aerosols among 1990-1993<sup>a</sup>, 2001-2003 and 2010-2013.

| Season | Anhydrosugars        |                      |                      | Sugar alcohols       |         |         | Primary sugars       |         |         | Total Sugars         |         |         |
|--------|----------------------|----------------------|----------------------|----------------------|---------|---------|----------------------|---------|---------|----------------------|---------|---------|
|        | 1990-93 <sup>a</sup> | 2001-03 <sup>b</sup> | 2010-13 <sup>b</sup> | 1990-93 <sup>a</sup> | 2001-03 | 2010-13 | 1990-93 <sup>a</sup> | 2001-03 | 2010-13 | 1990-93 <sup>a</sup> | 2001-03 | 2010-13 |
| Winter | 1.44                 | 2.44                 | 3.05                 | 5.64                 | 2.27    | 4.37    | 10.6                 | 9.34    | 21.8    | 17.7                 | 14.0    | 29.2    |
| %      | 11.4                 | 23.7                 | 16.6                 | 31.6                 | 16.5    | 19.8    | 57.0                 | 59.9    | 63.6    |                      |         |         |
| Spring | 0.68                 | 1.12                 | 1.10                 | 6.91                 | 16.2    | 18.6    | 10.5                 | 21.3    | 26.7    | 18.1                 | 38.6    | 46.4    |
| %      | 5.08                 | 5.17                 | 4.04                 | 39.2                 | 39.7    | 42.0    | 55.7                 | 55.1    | 53.9    |                      |         |         |
| Summer | 0.31                 | 0.43                 | 0.29                 | 6.50                 | 36.7    | 43.1    | 6.07                 | 30.0    | 42.5    | 12.9                 | 67.1    | 86.0    |
| %      | 2.92                 | 0.91                 | 0.43                 | 55.6                 | 51.3    | 51.1    | 41.4                 | 47.8    | 48.5    |                      |         |         |
| Autumn | 1.12                 | 0.65                 | 0.60                 | 2.57                 | 34.7    | 38.3    | 6.79                 | 22.6    | 24.5    | 10.5                 | 57.9    | 63.4    |
| %      | 12.9                 | 3.45                 | 1.73                 | 29.2                 | 50.4    | 57.2    | 57.9                 | 46.2    | 41.1    |                      |         |         |

<sup>a</sup> data from Chen et al. (2013), <sup>b</sup> data from Verma et al. (2015).

1319  
 1320
